# Supplementary material for: Translatomics combined with transcriptomics and proteomics reveals novel functional, recently evolved orphan genes in Escherichia coli O157:H7 (EHEC)
Source: PubMed Central journal article supplement (PMC4765031; doi:10.1186/s12864-016-2456-1), 2016-02-24

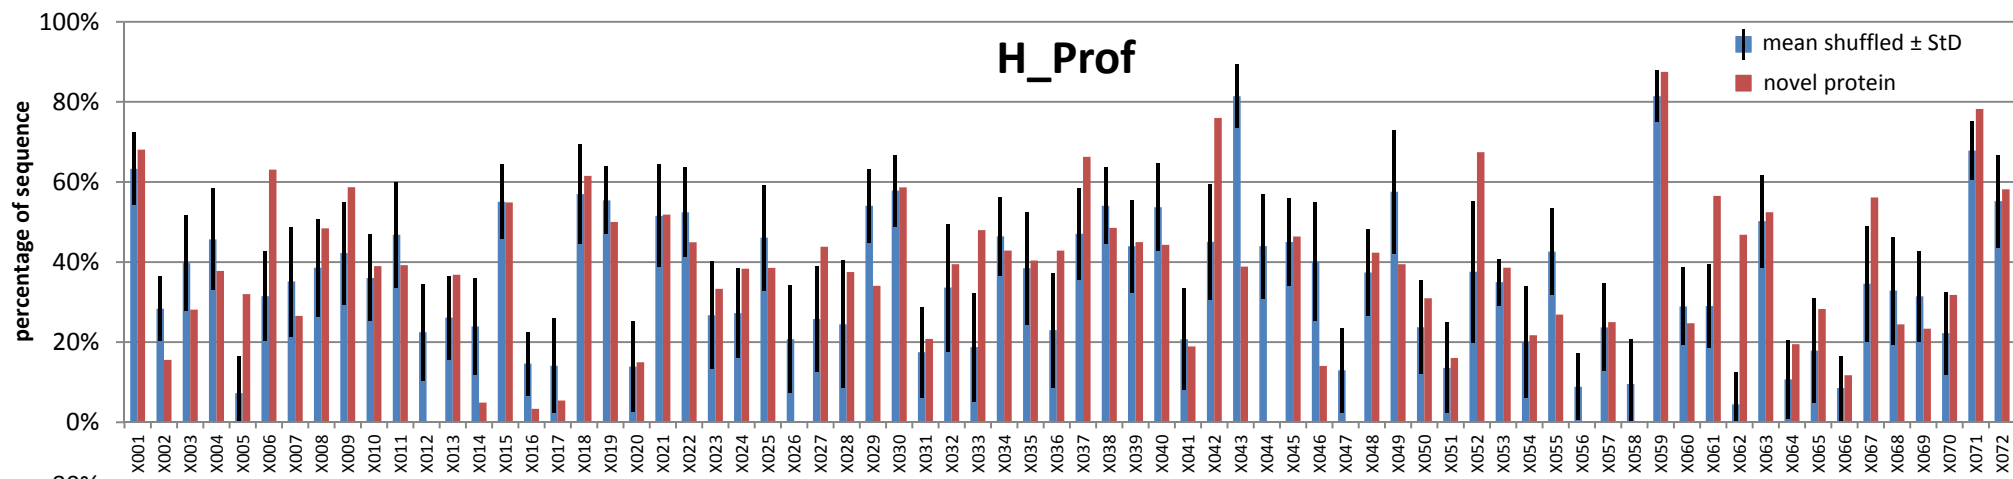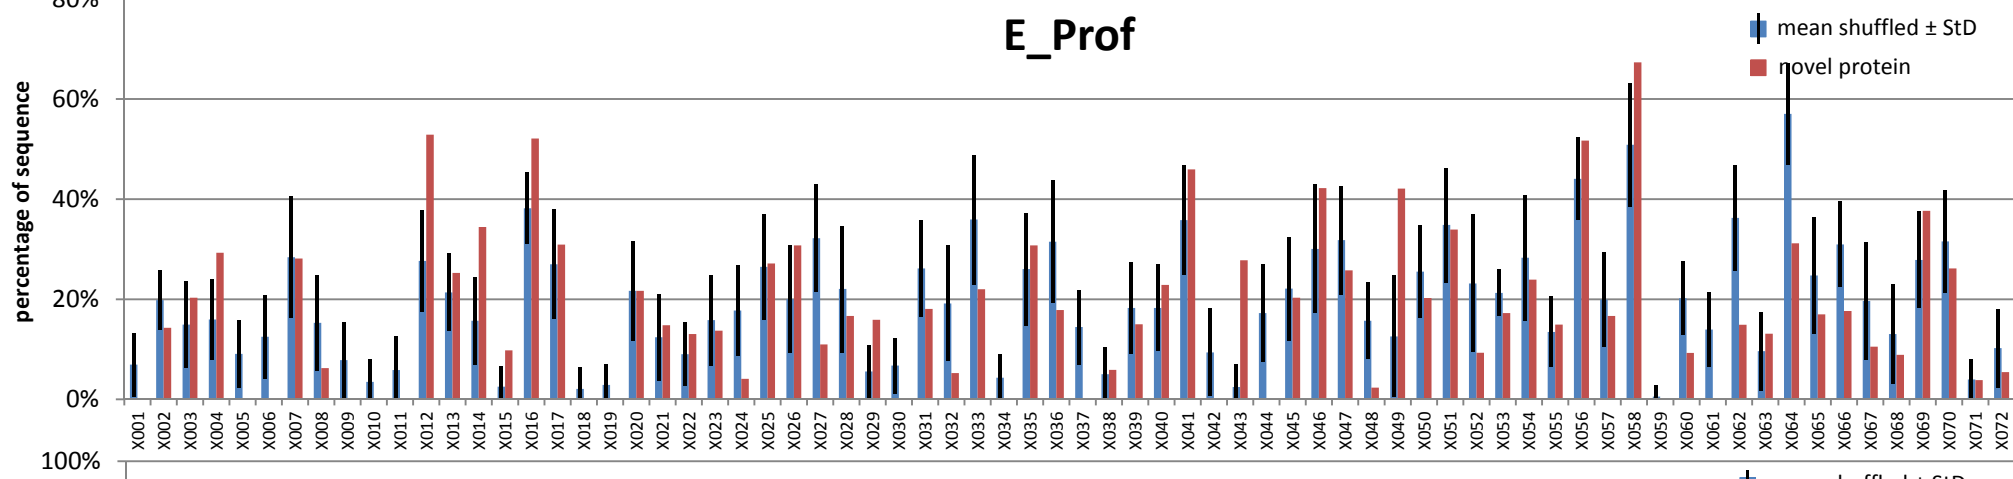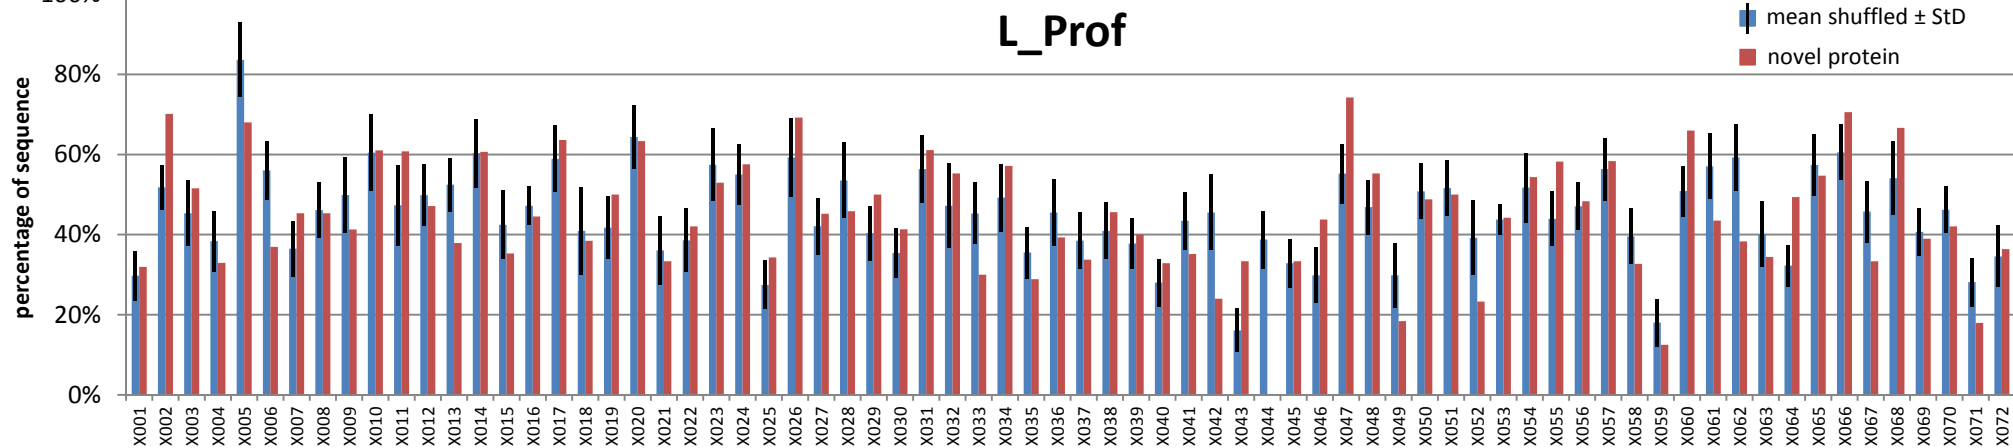

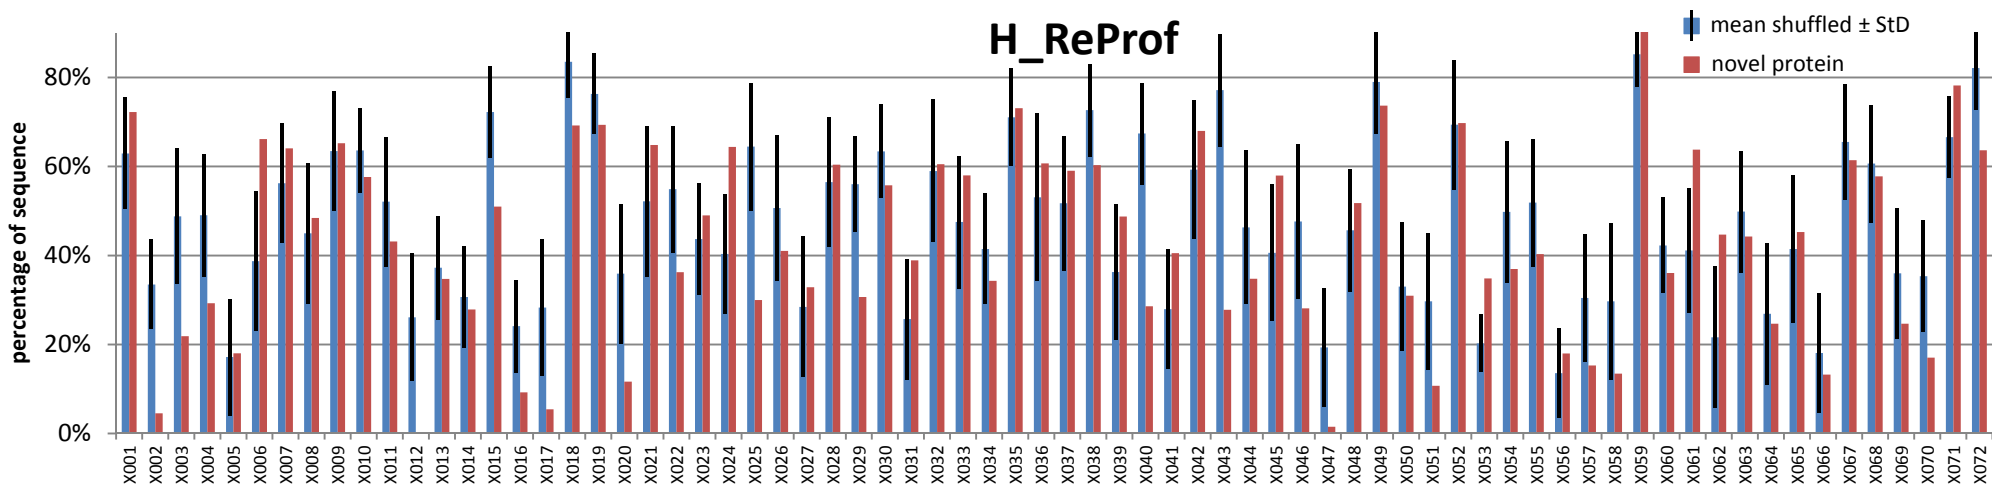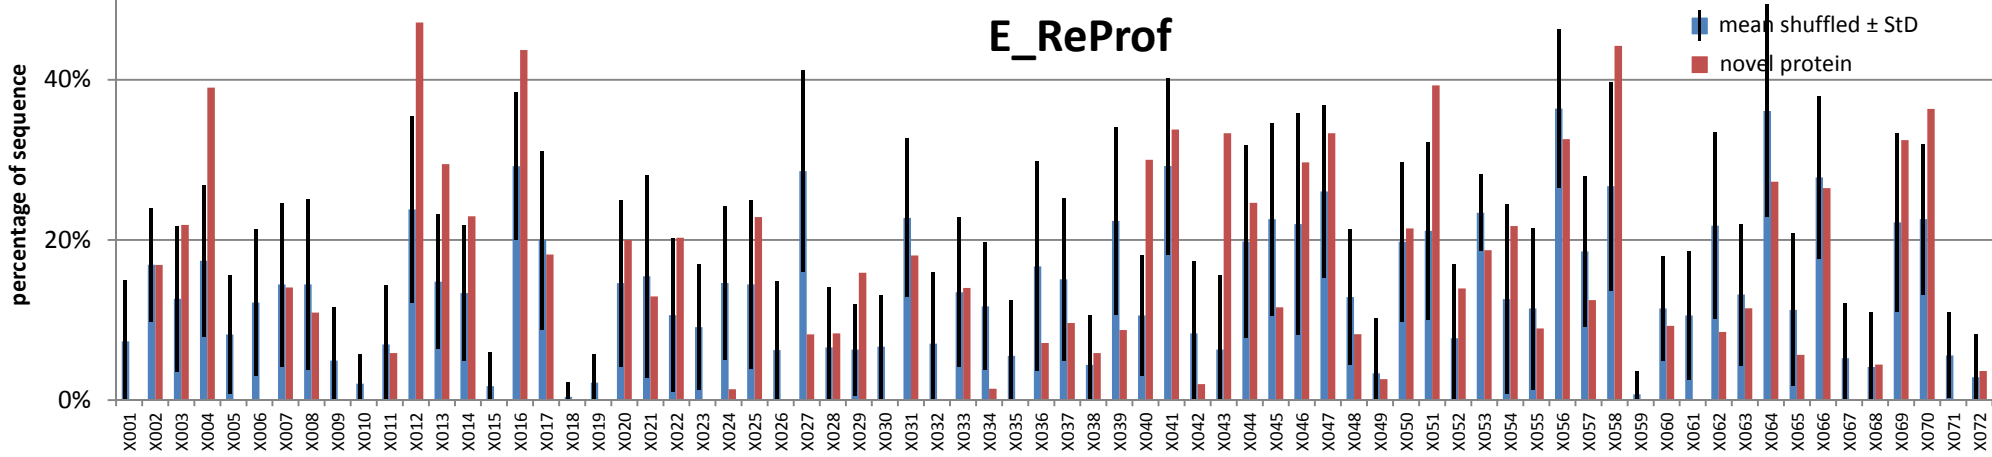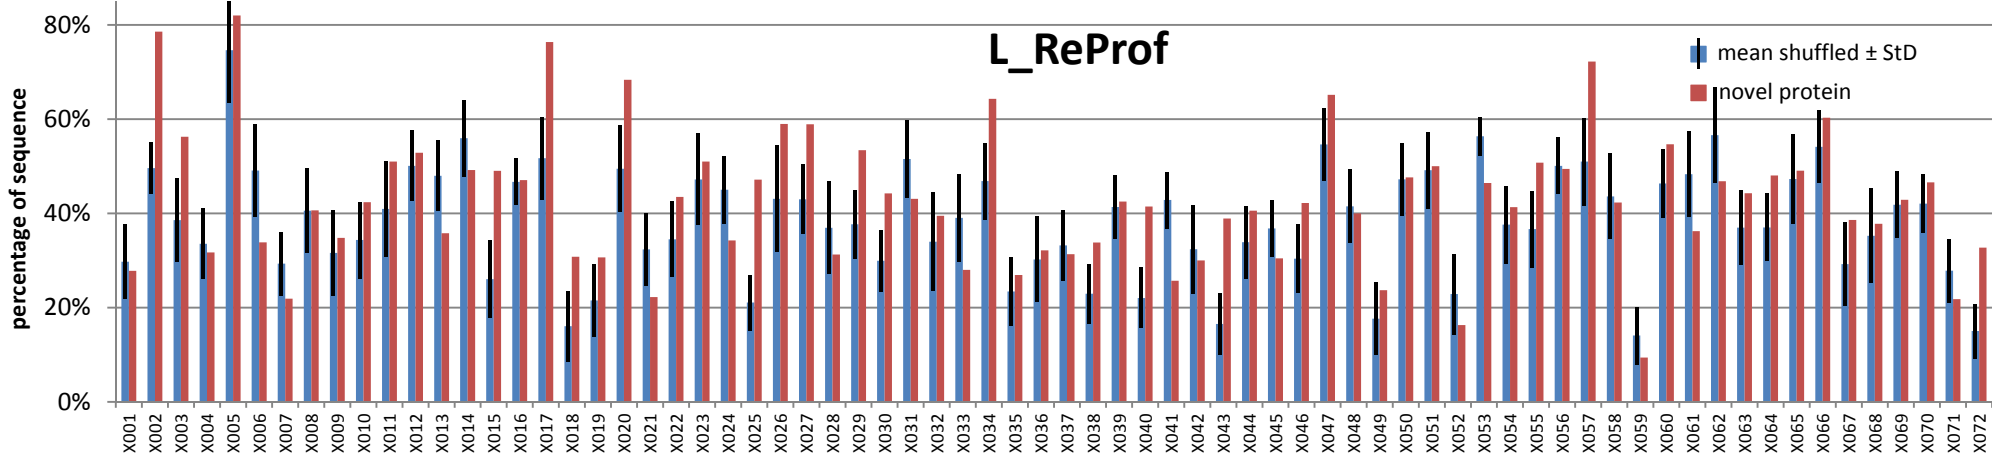

# Buried\_Prof

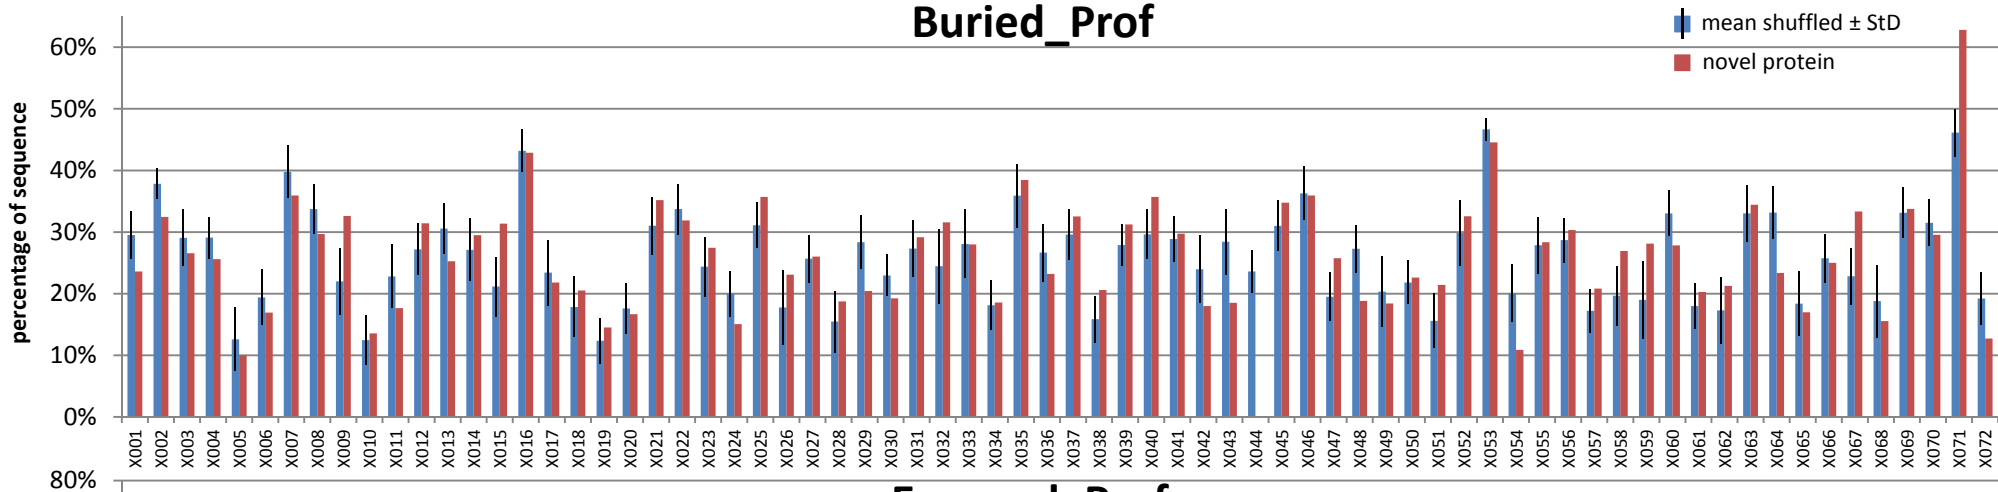

# Exposed\_Prof

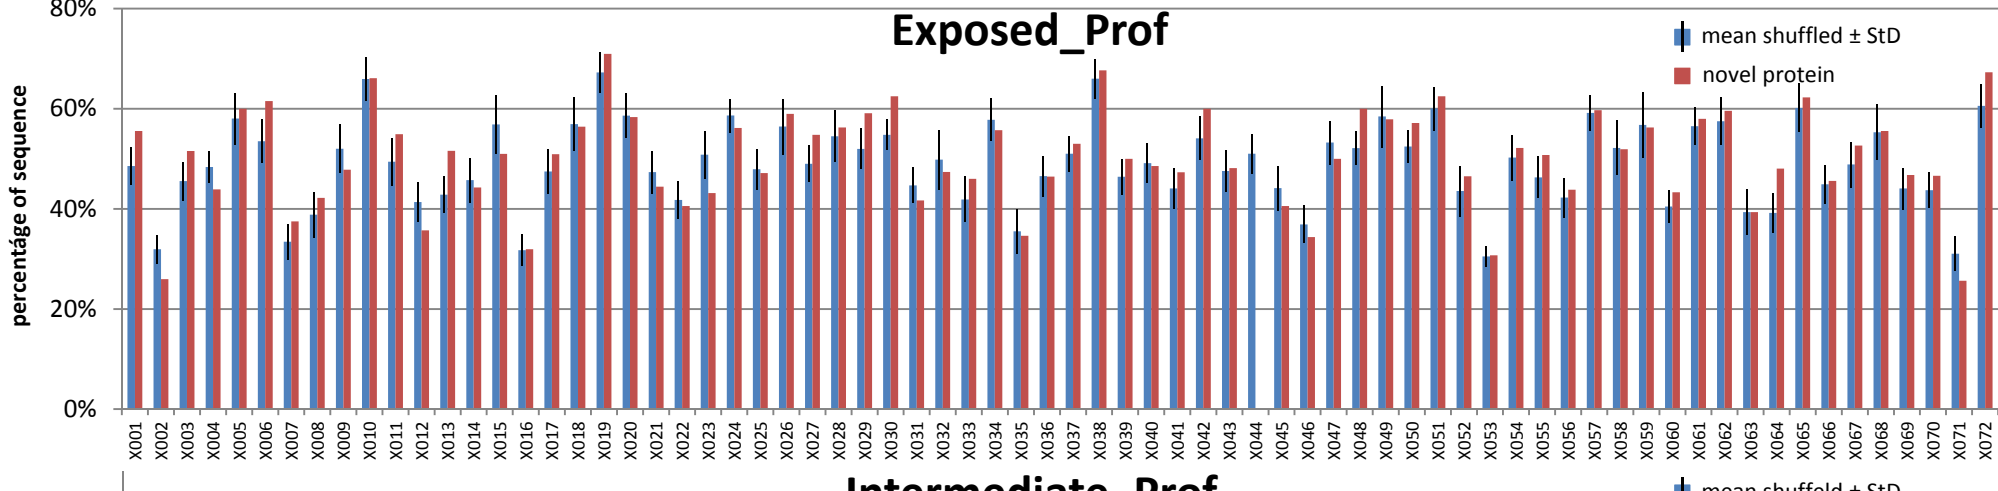

# Intermediate\_Prof

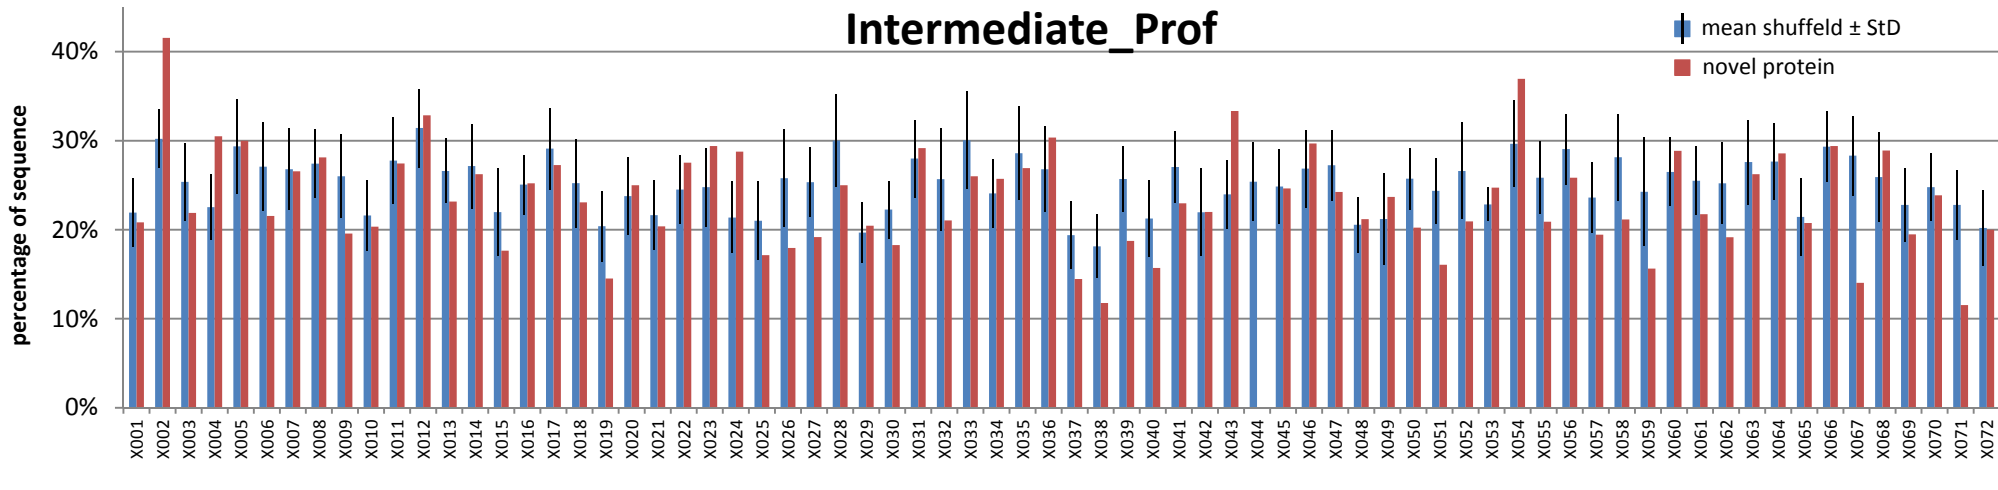

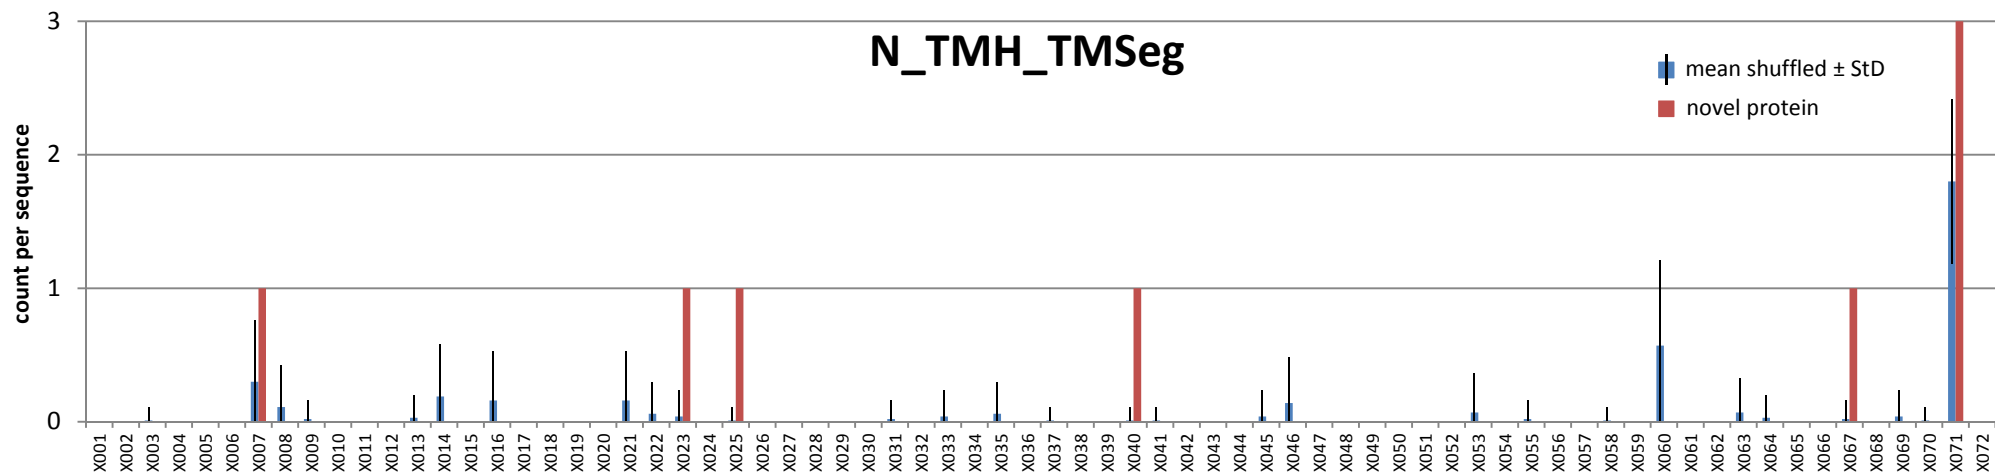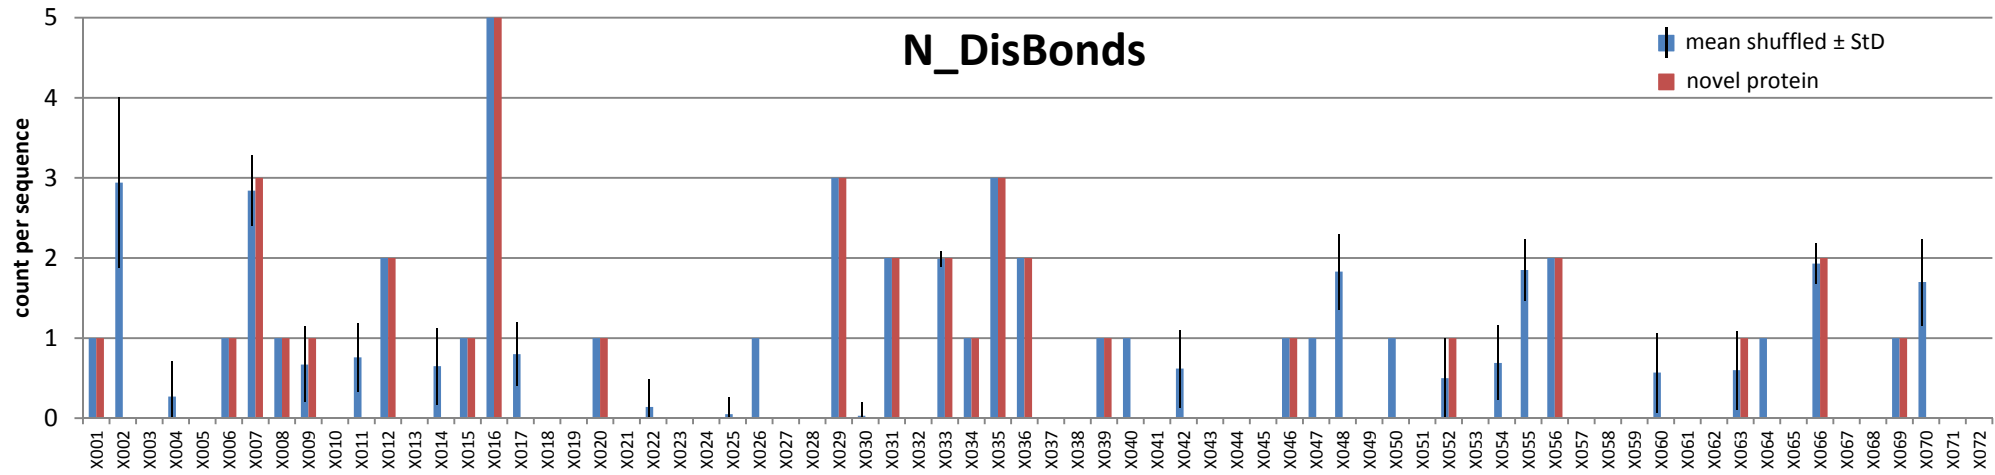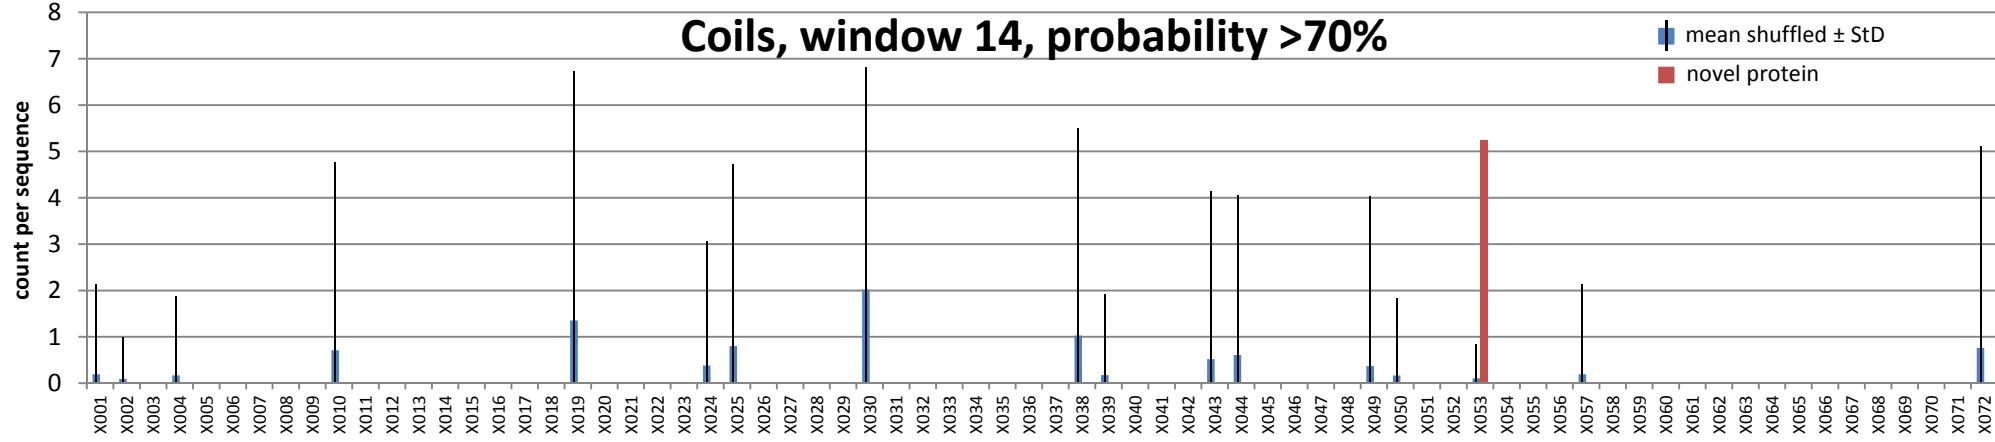

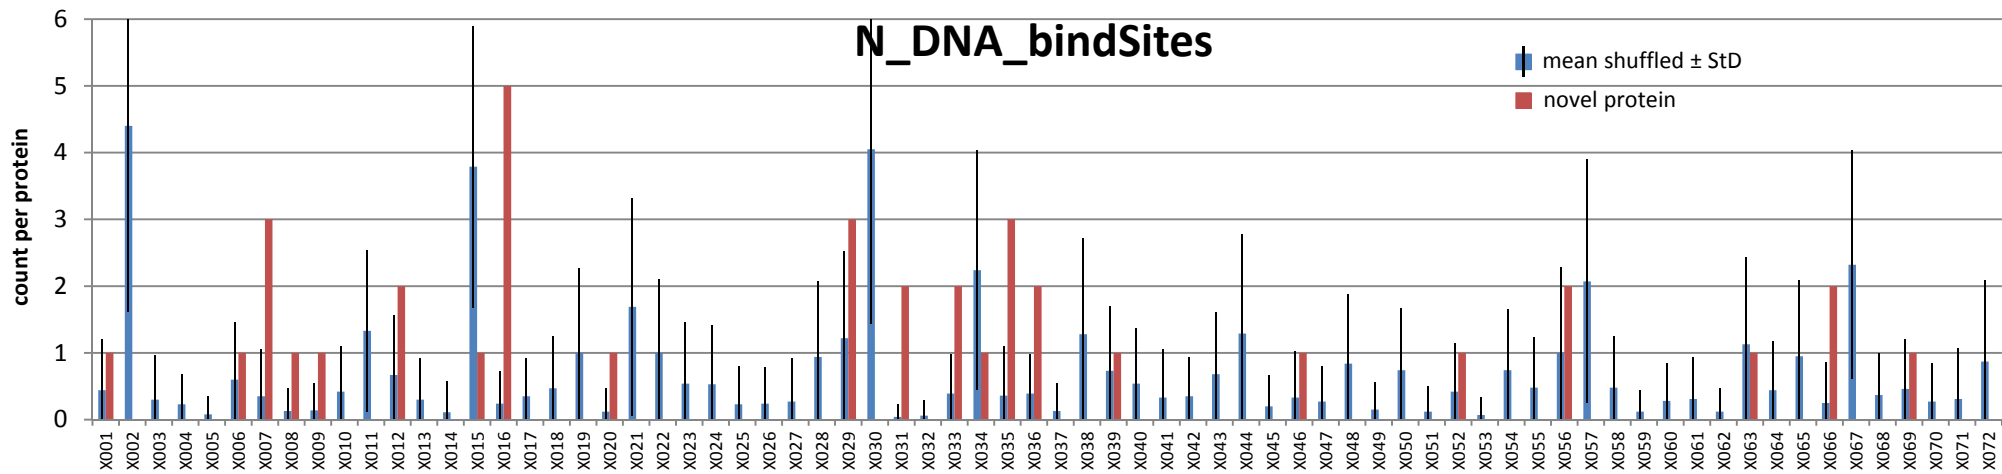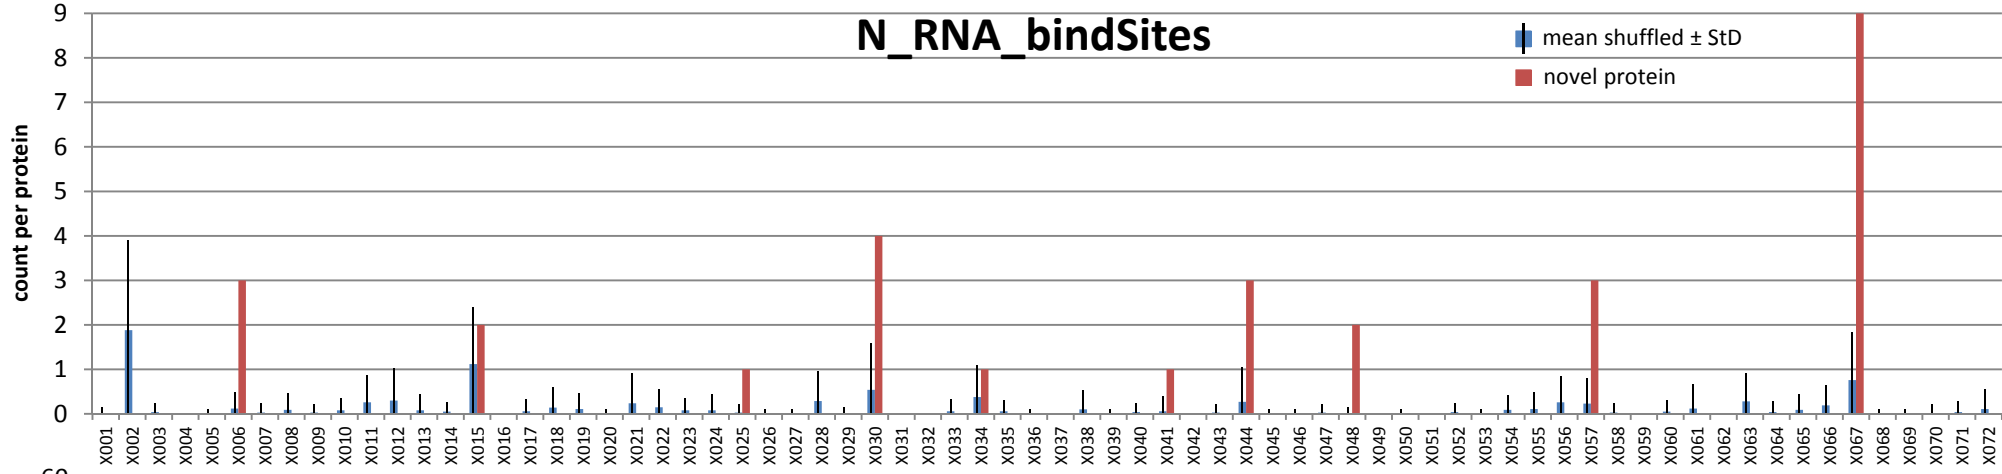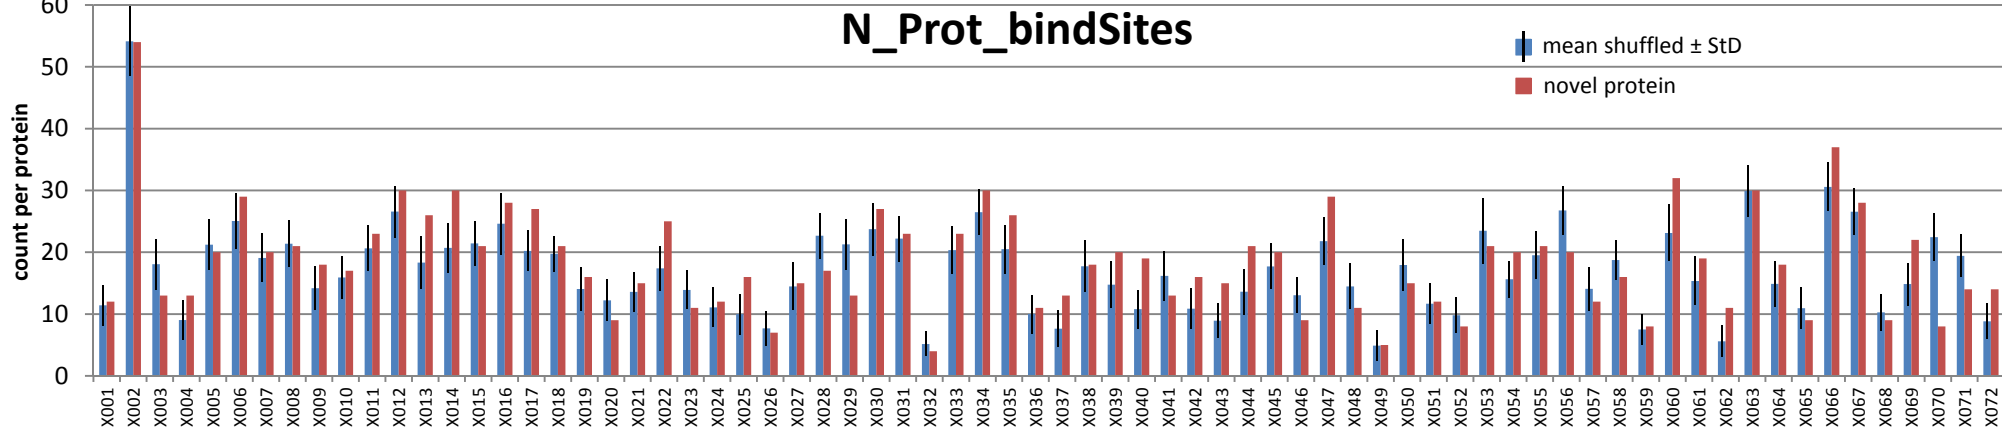

### BLAST hit (e value $\leq 10^{-3}$ )

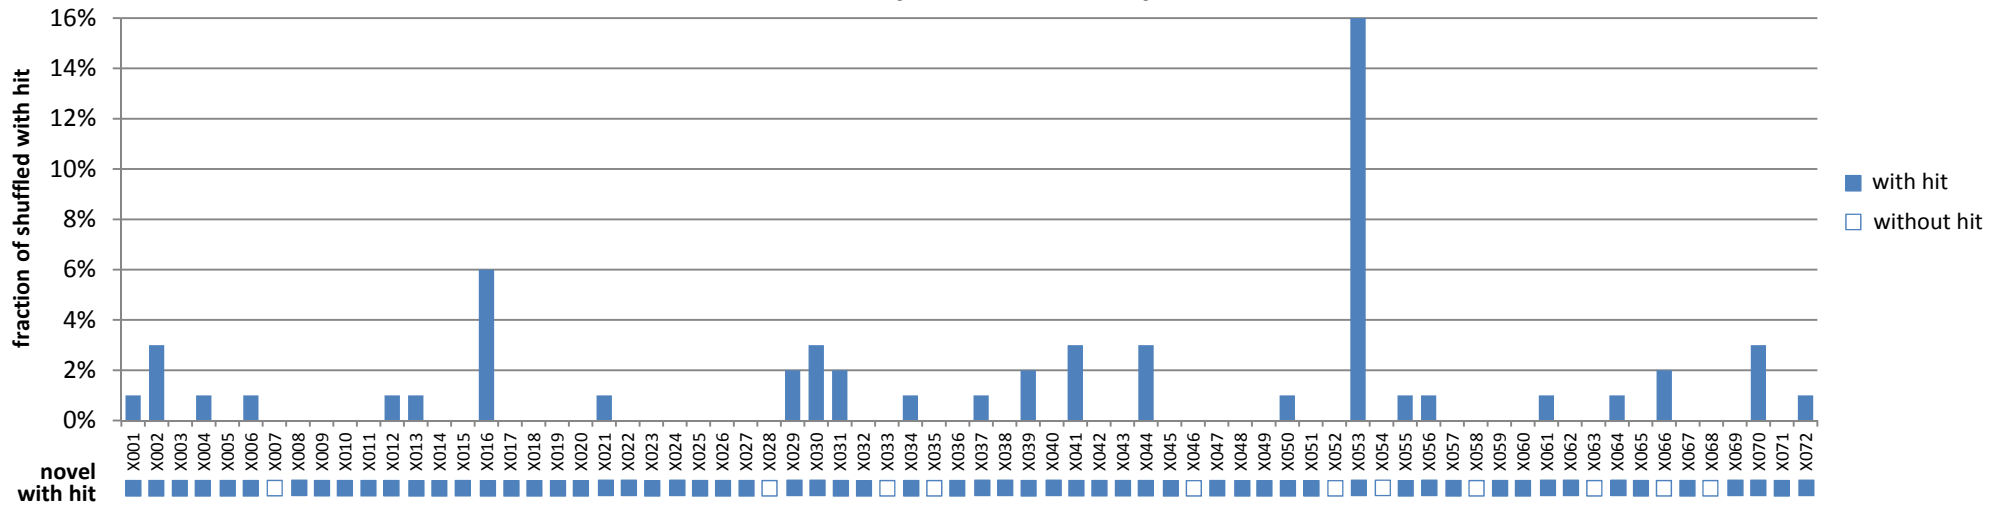

### localization prediction

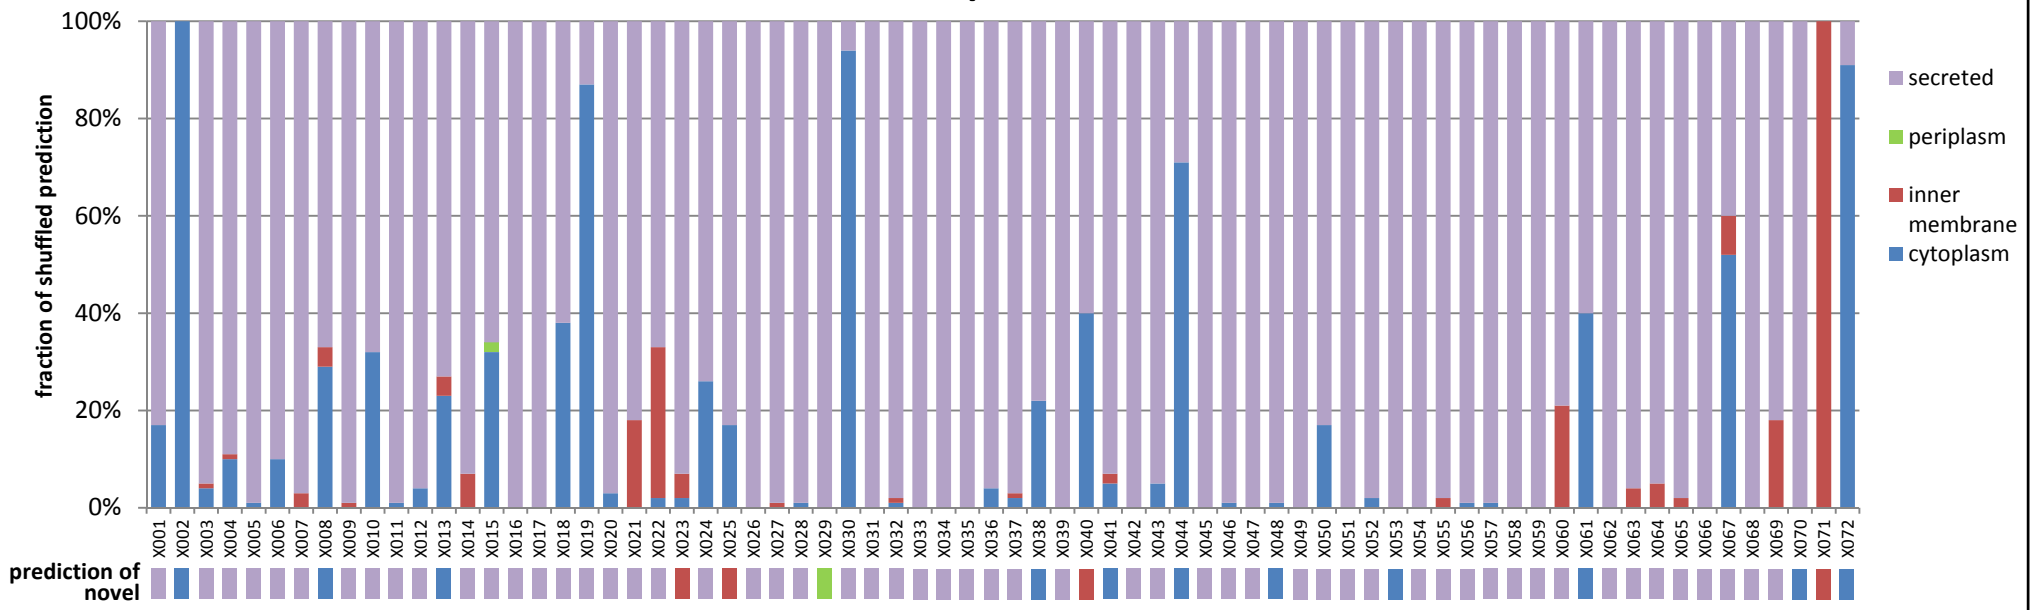

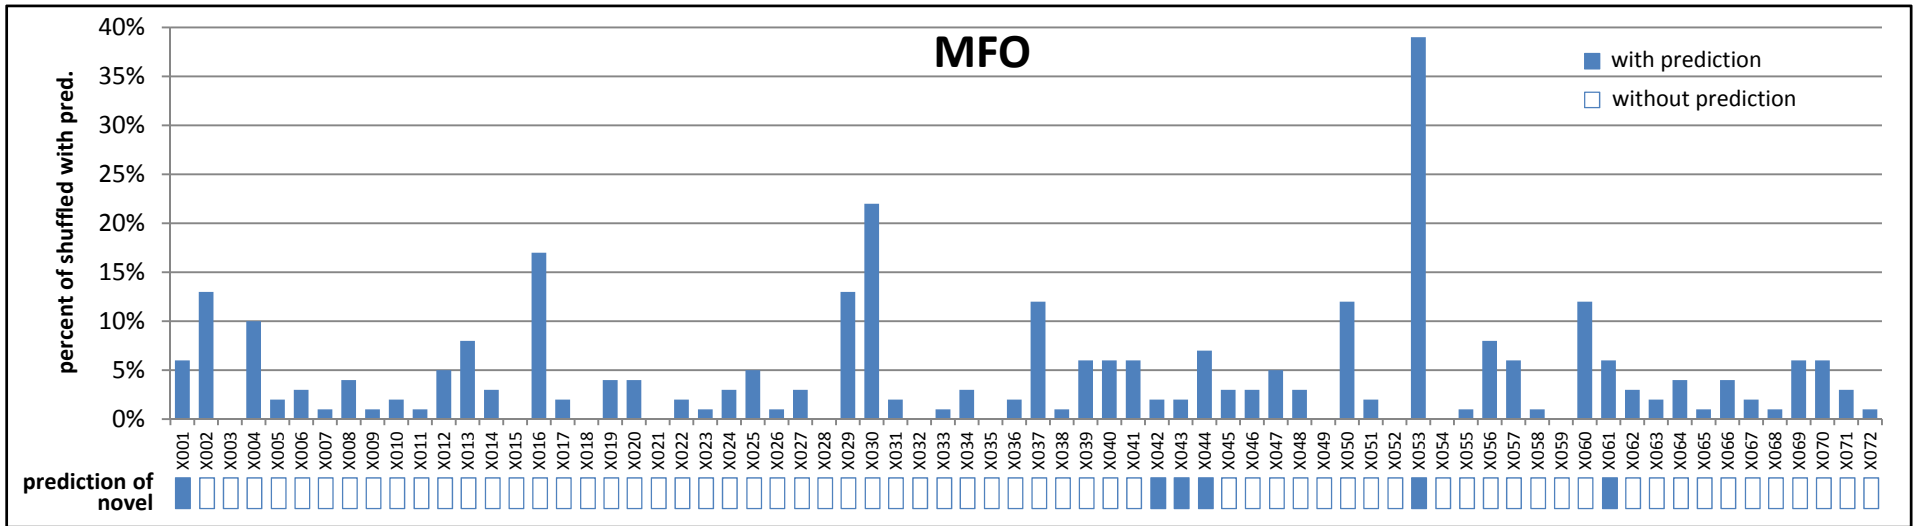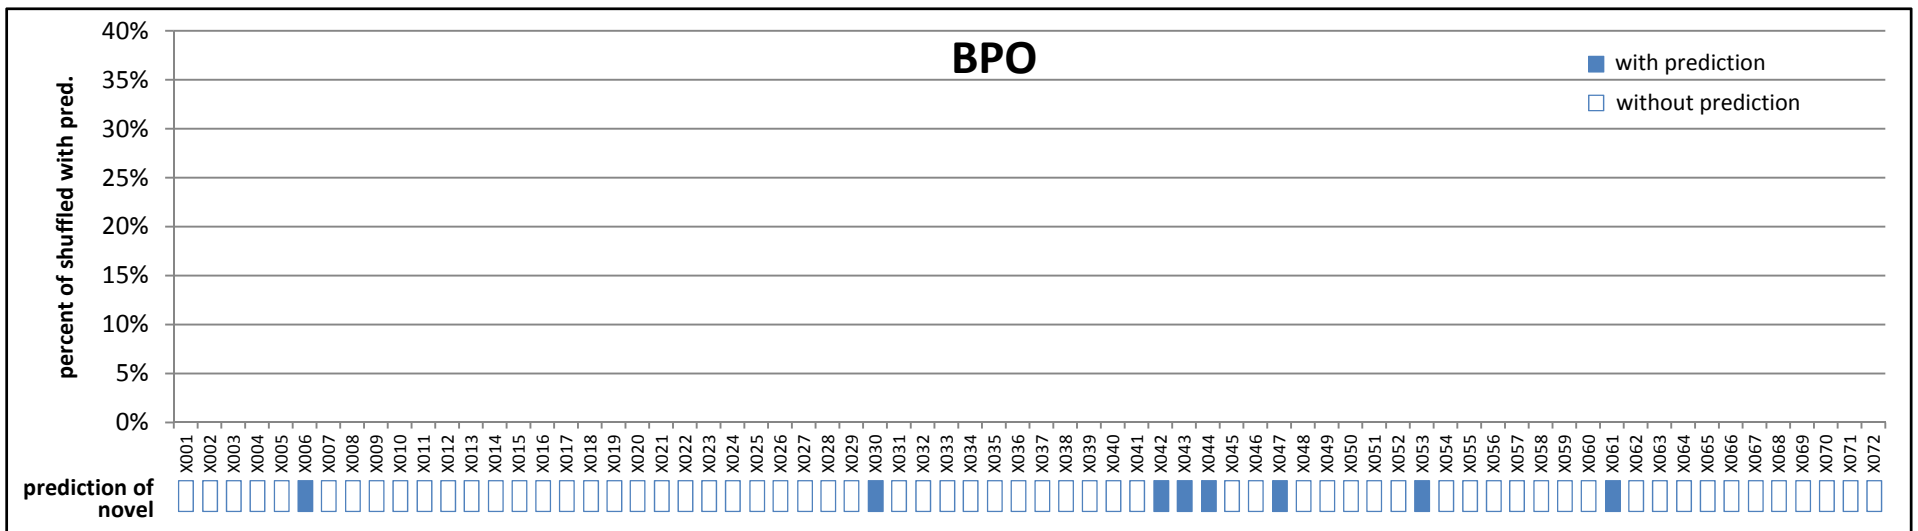

## Fraction residues disordered (MetaDisorder)

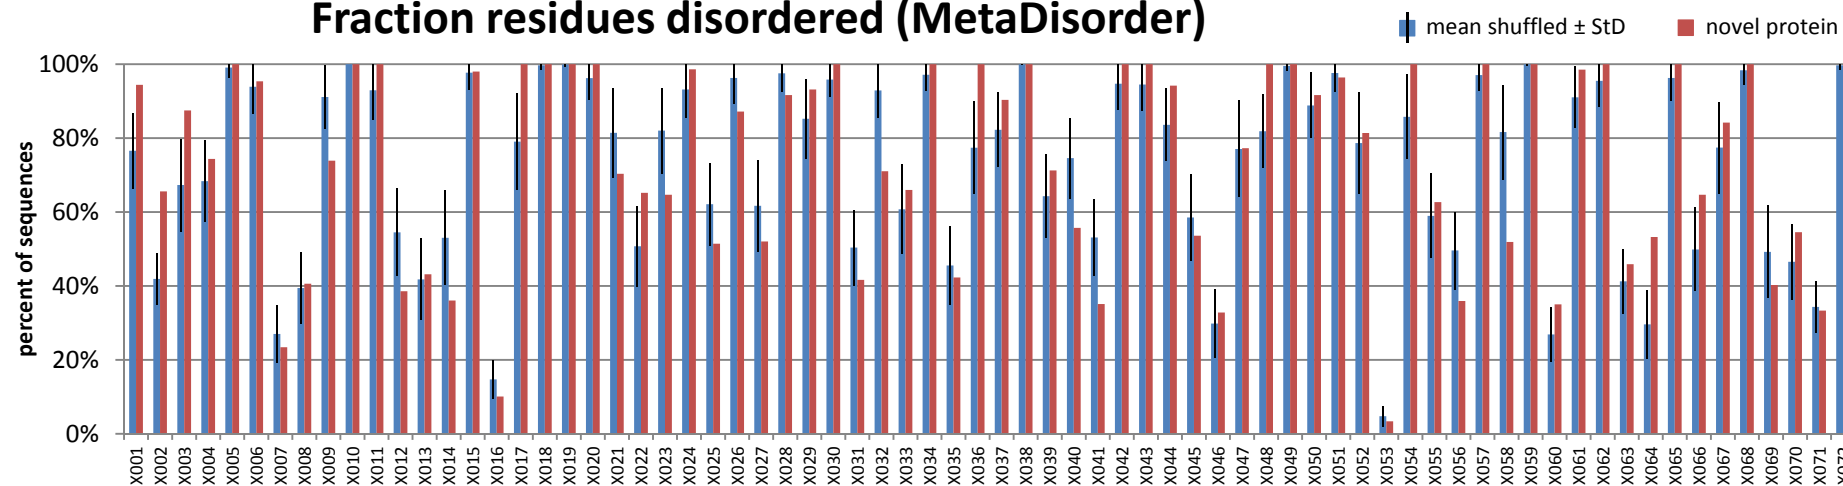

## Sequences with disordered region $\geq 30$ residues (MetaDisorder)

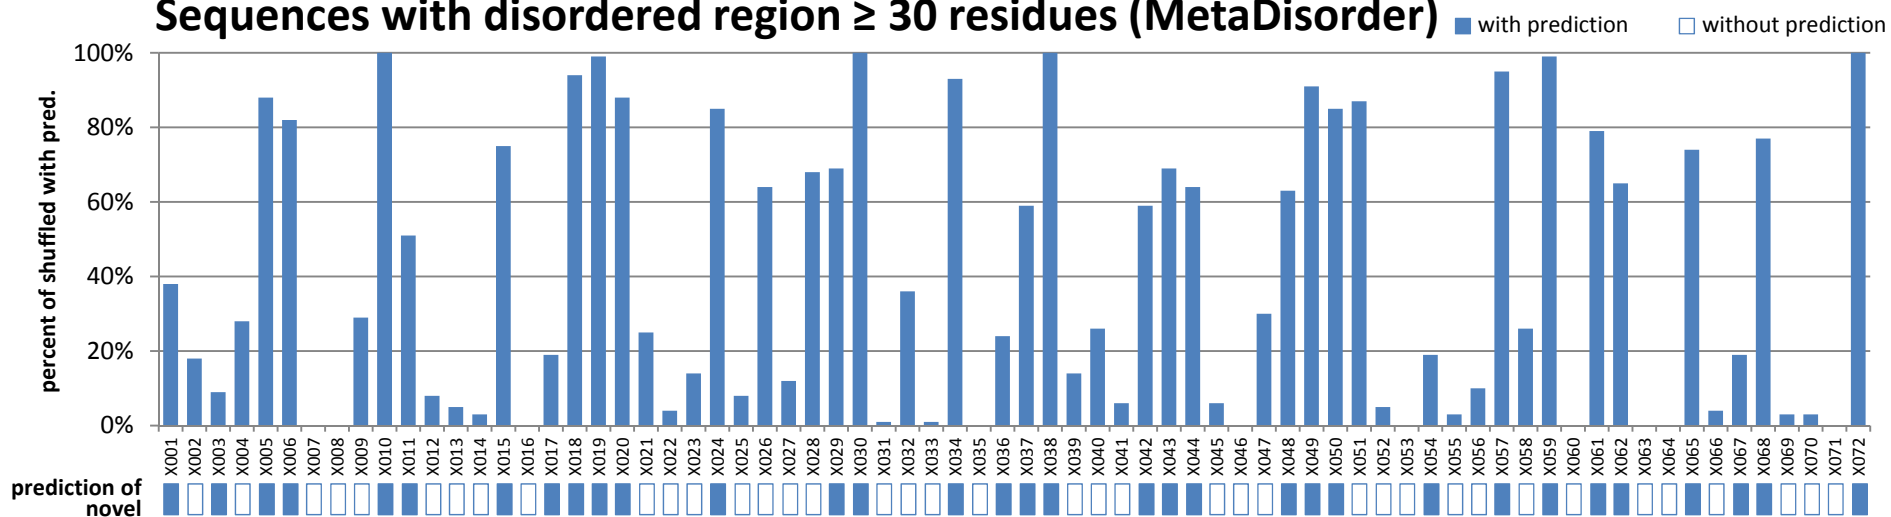

Supplement: 12864_2016_2456_MOESM6_ESM.pdf [file 12864_2016_2456_MOESM6_ESM.pdf]
