# Supplementary material for: Translatomics combined with transcriptomics and proteomics reveals novel functional, recently evolved orphan genes in Escherichia coli O157:H7 (EHEC)
Source: PubMed Central journal article supplement (PMC4765031; doi:10.1186/s12864-016-2456-1), 2016-02-24

### annotated proteins

### novel proteins

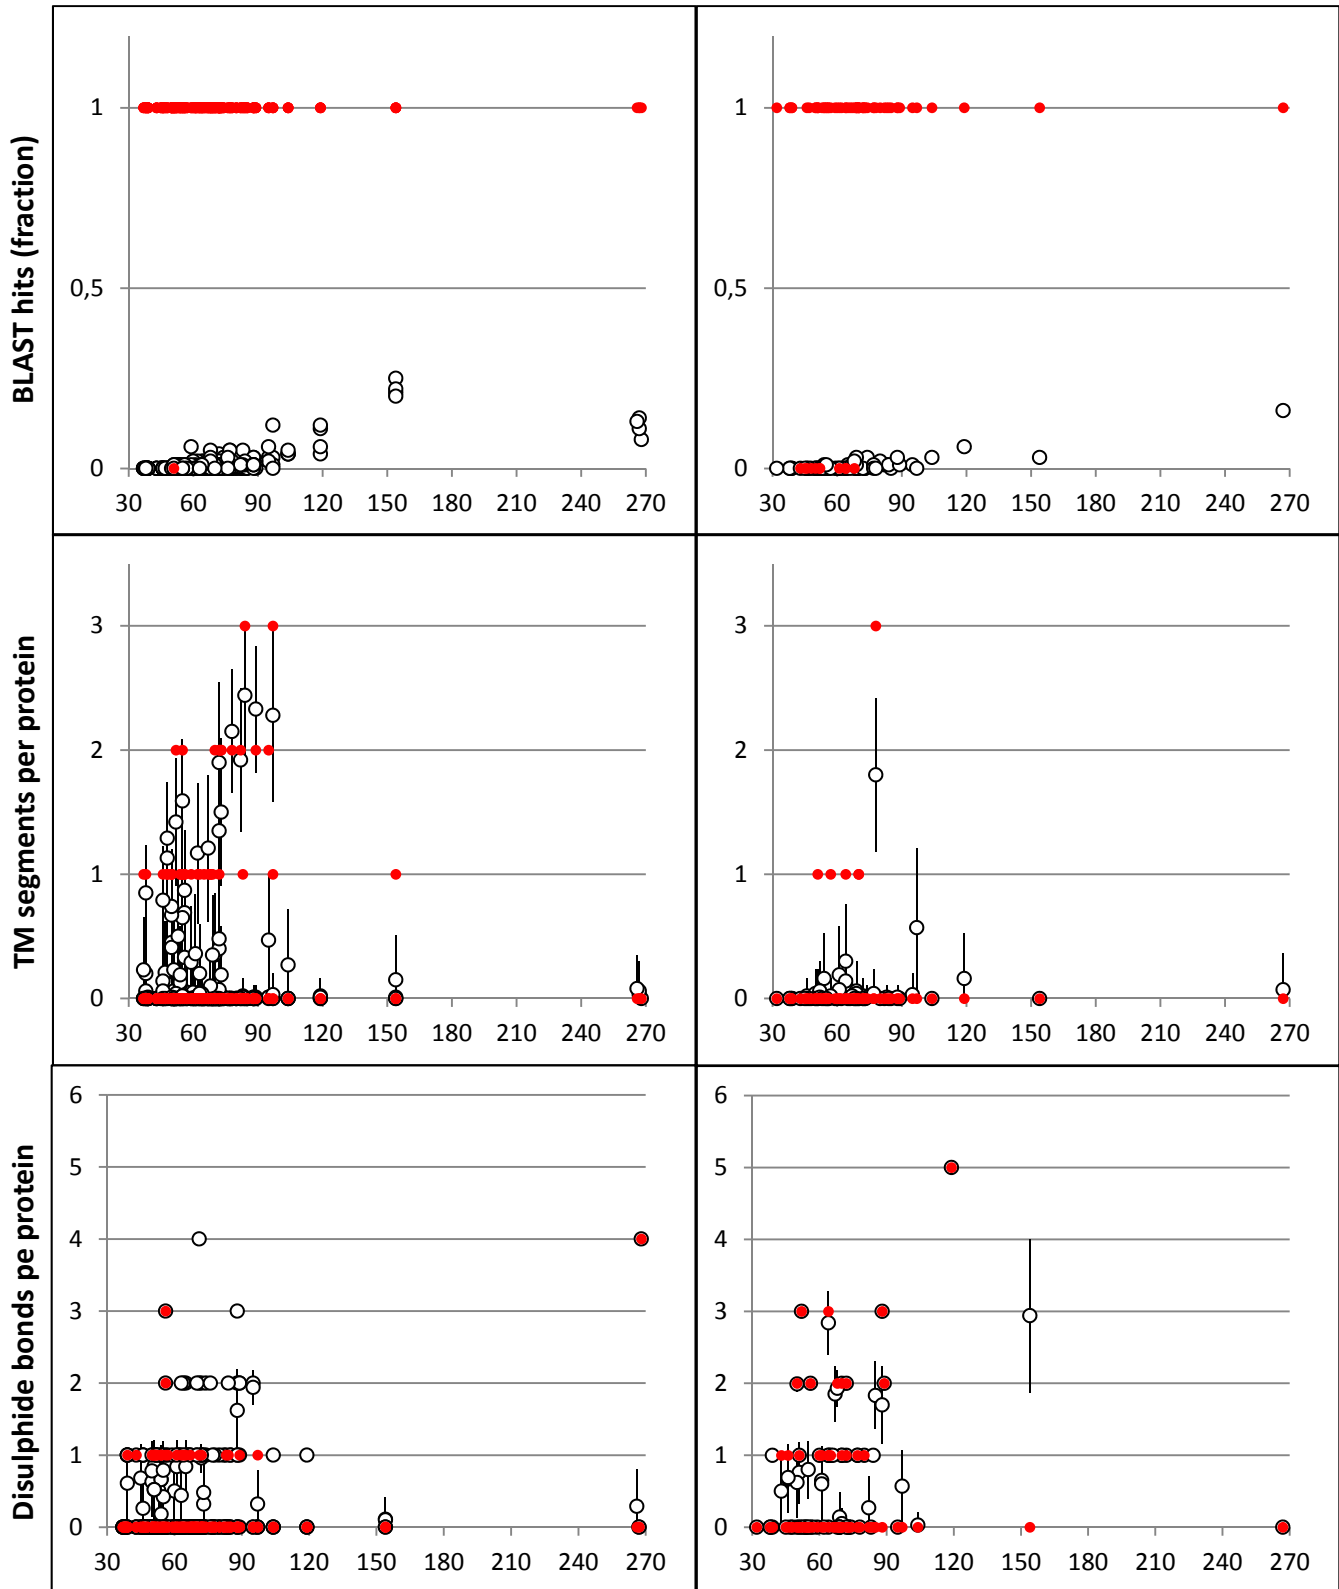

● – actual protein

○ – mean of 100 scrambled plus minus 1 StDev.

annotated proteins

novel proteins

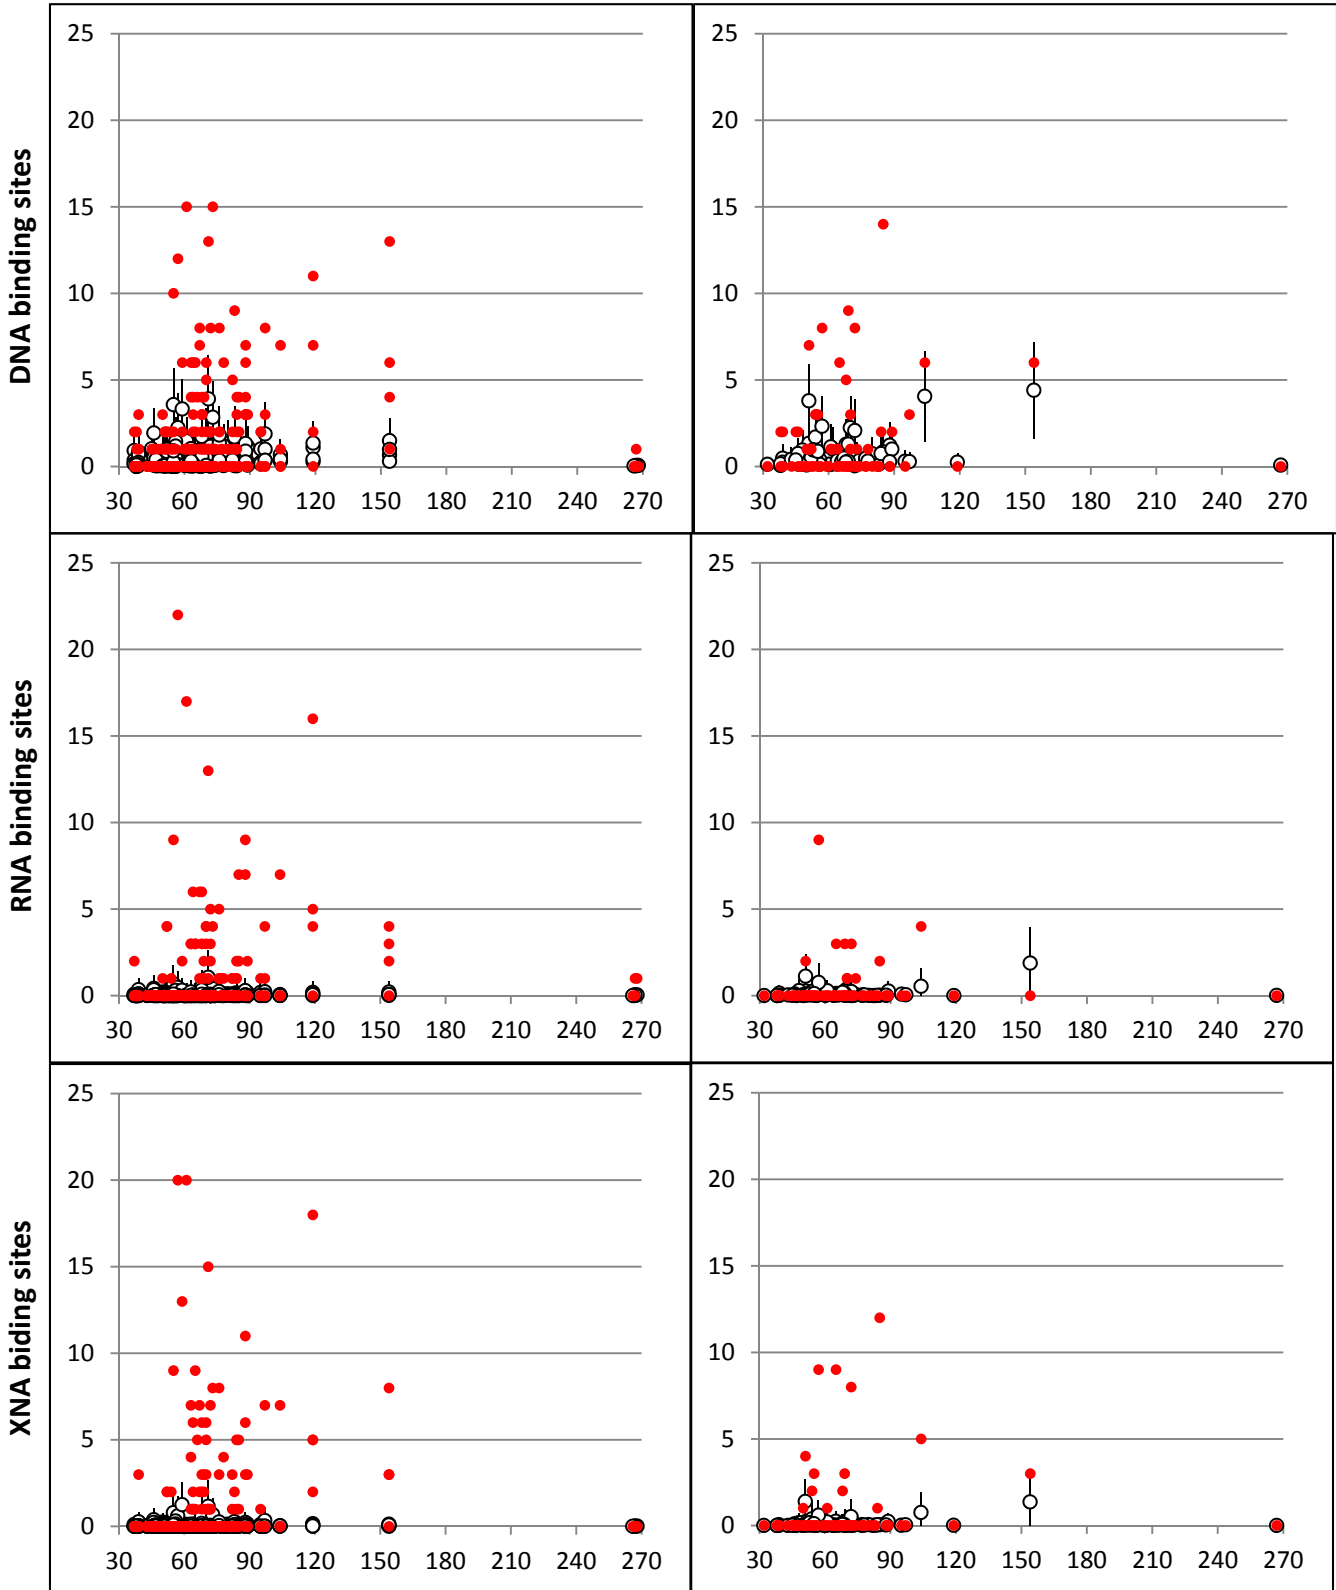

● – actual protein

○ – mean of 100 scrambled plus minus 1 StDev.

annotated proteins

novel proteins

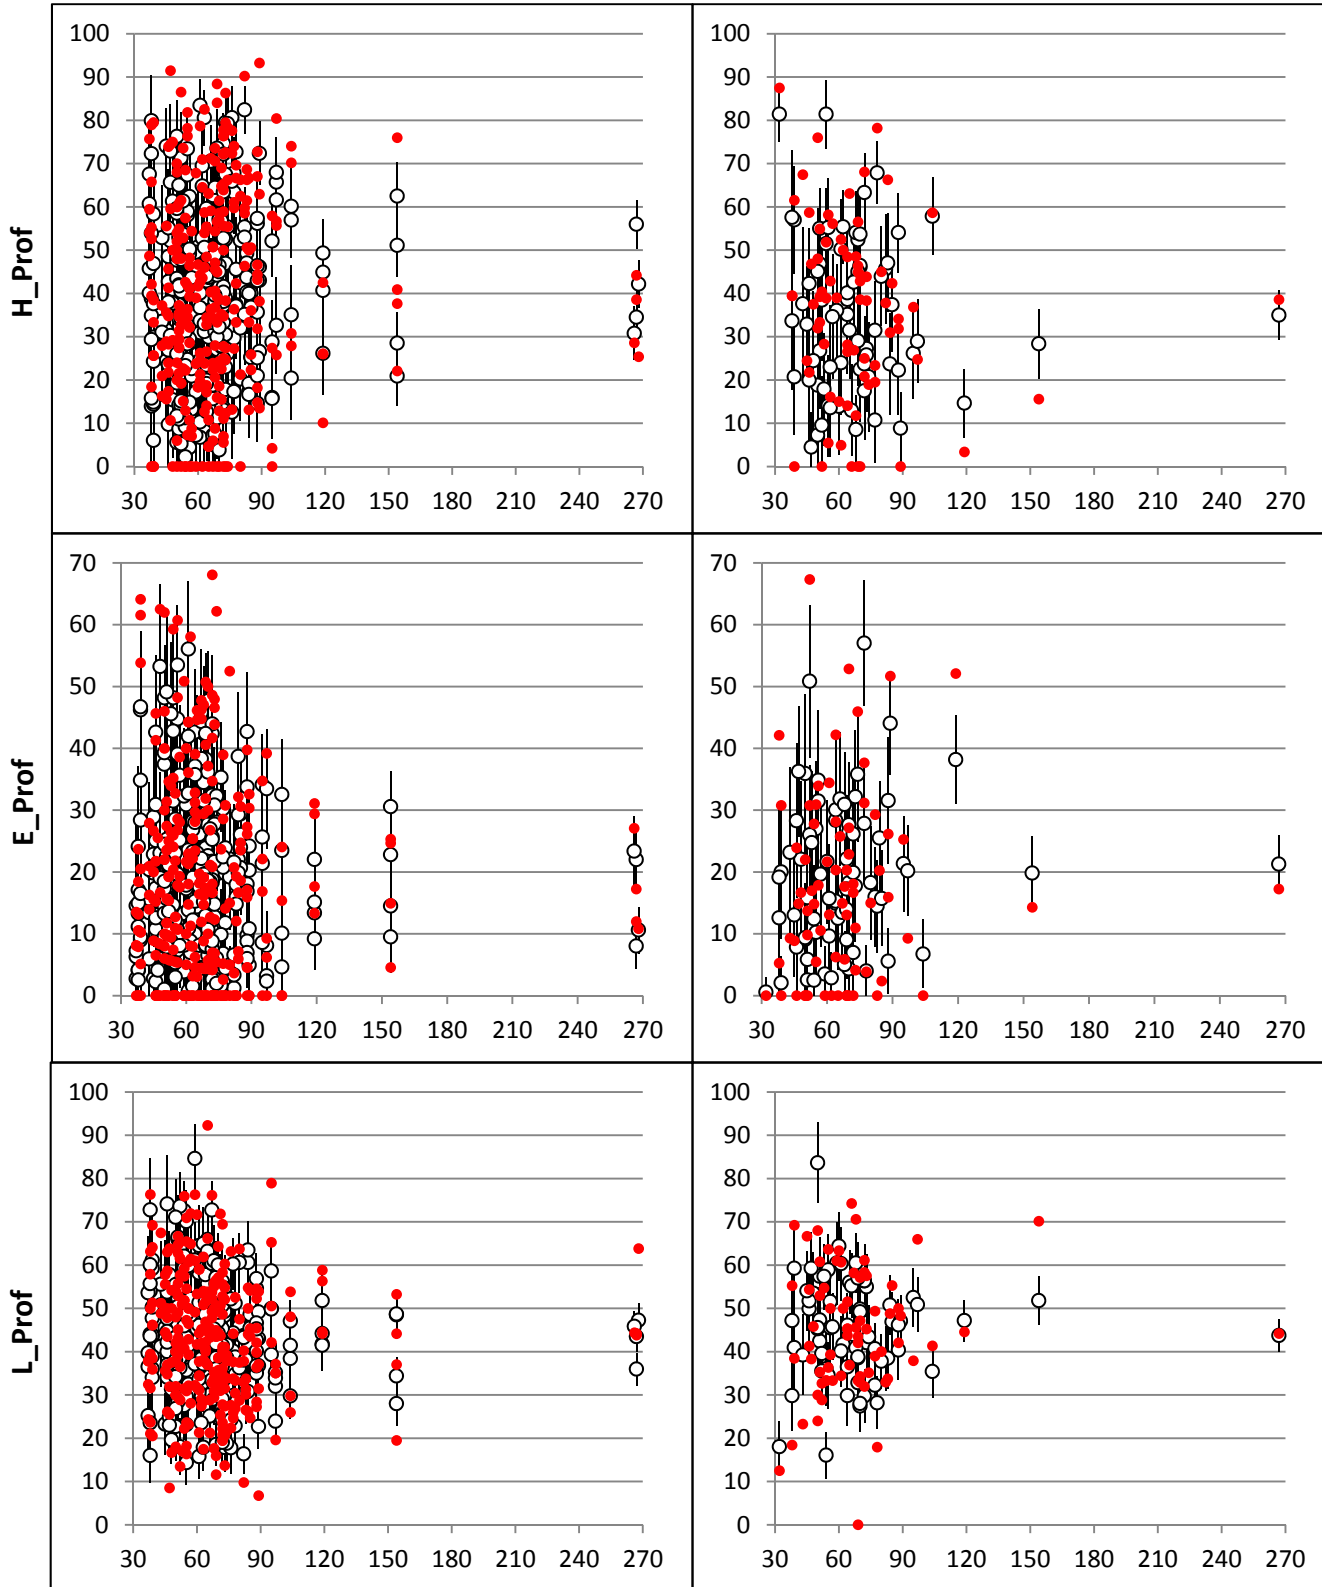

● – actual protein

○ – mean of 100 scrambled plus minus 1 StDev.

annotated proteins

novel proteins

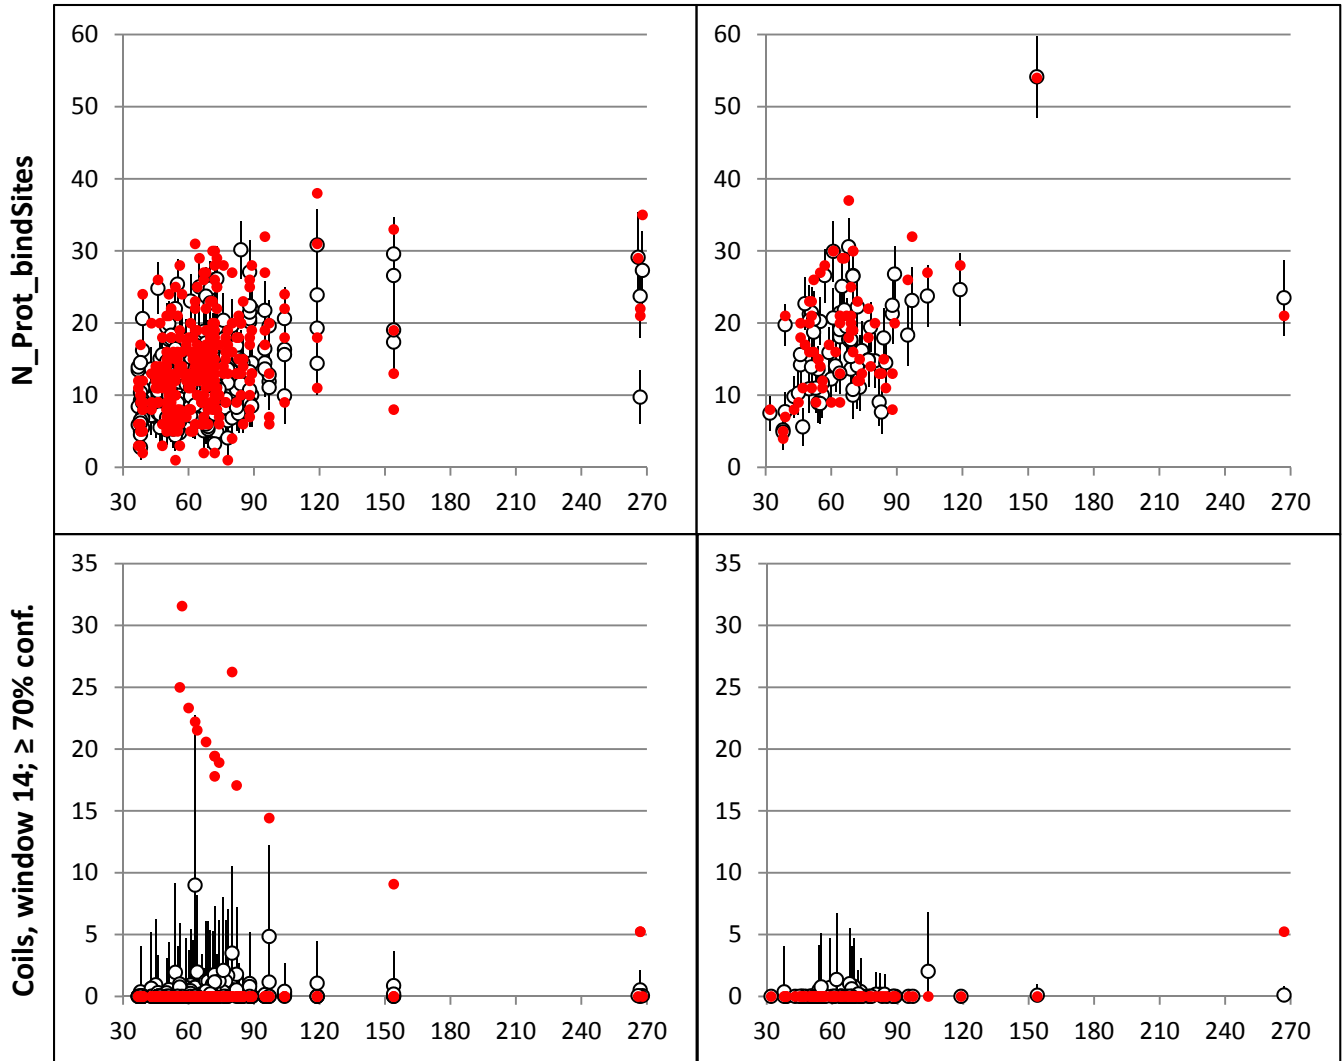

● – actual protein

○ – mean of 100 scrambled plus minus 1 StDev.

annotated proteins

novel proteins

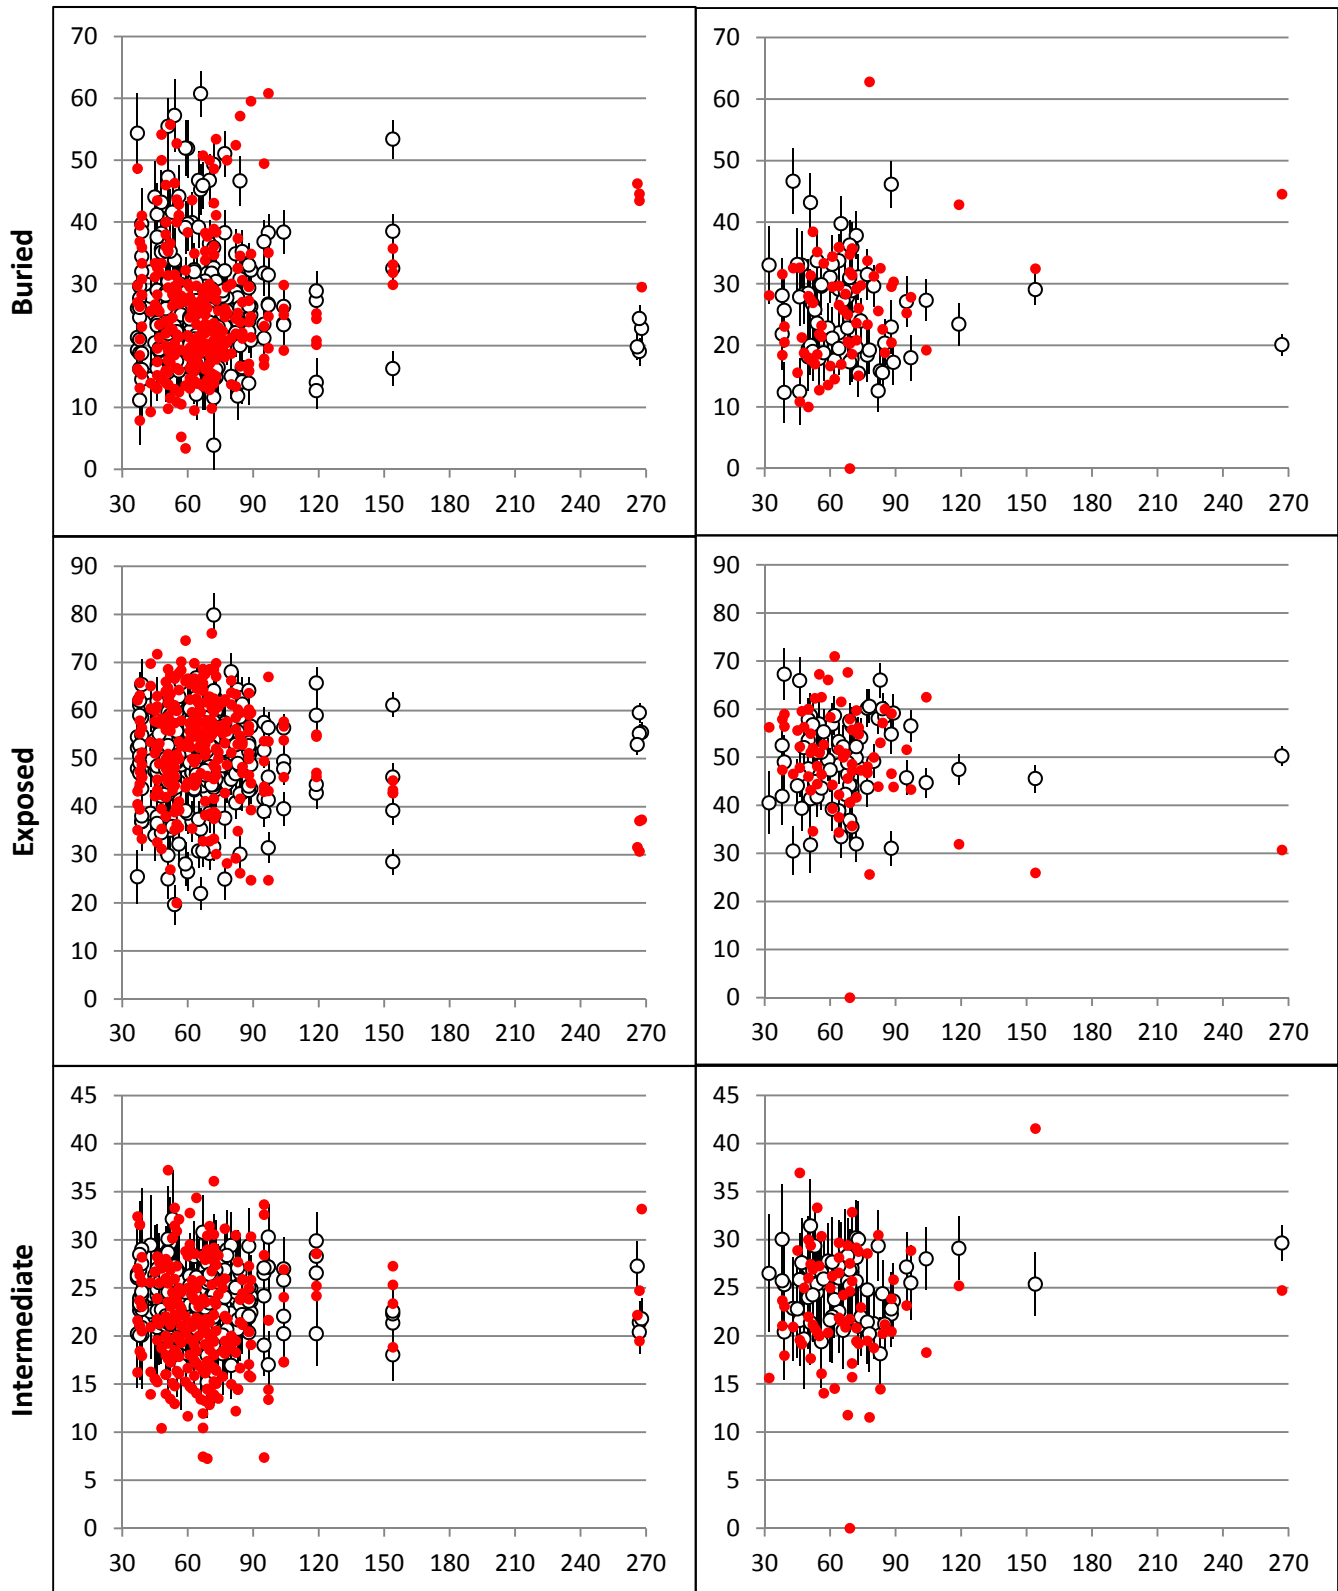

● – actual protein

○ – mean of 100 scrambled plus minus 1 StDev.

annotated proteins

novel proteins

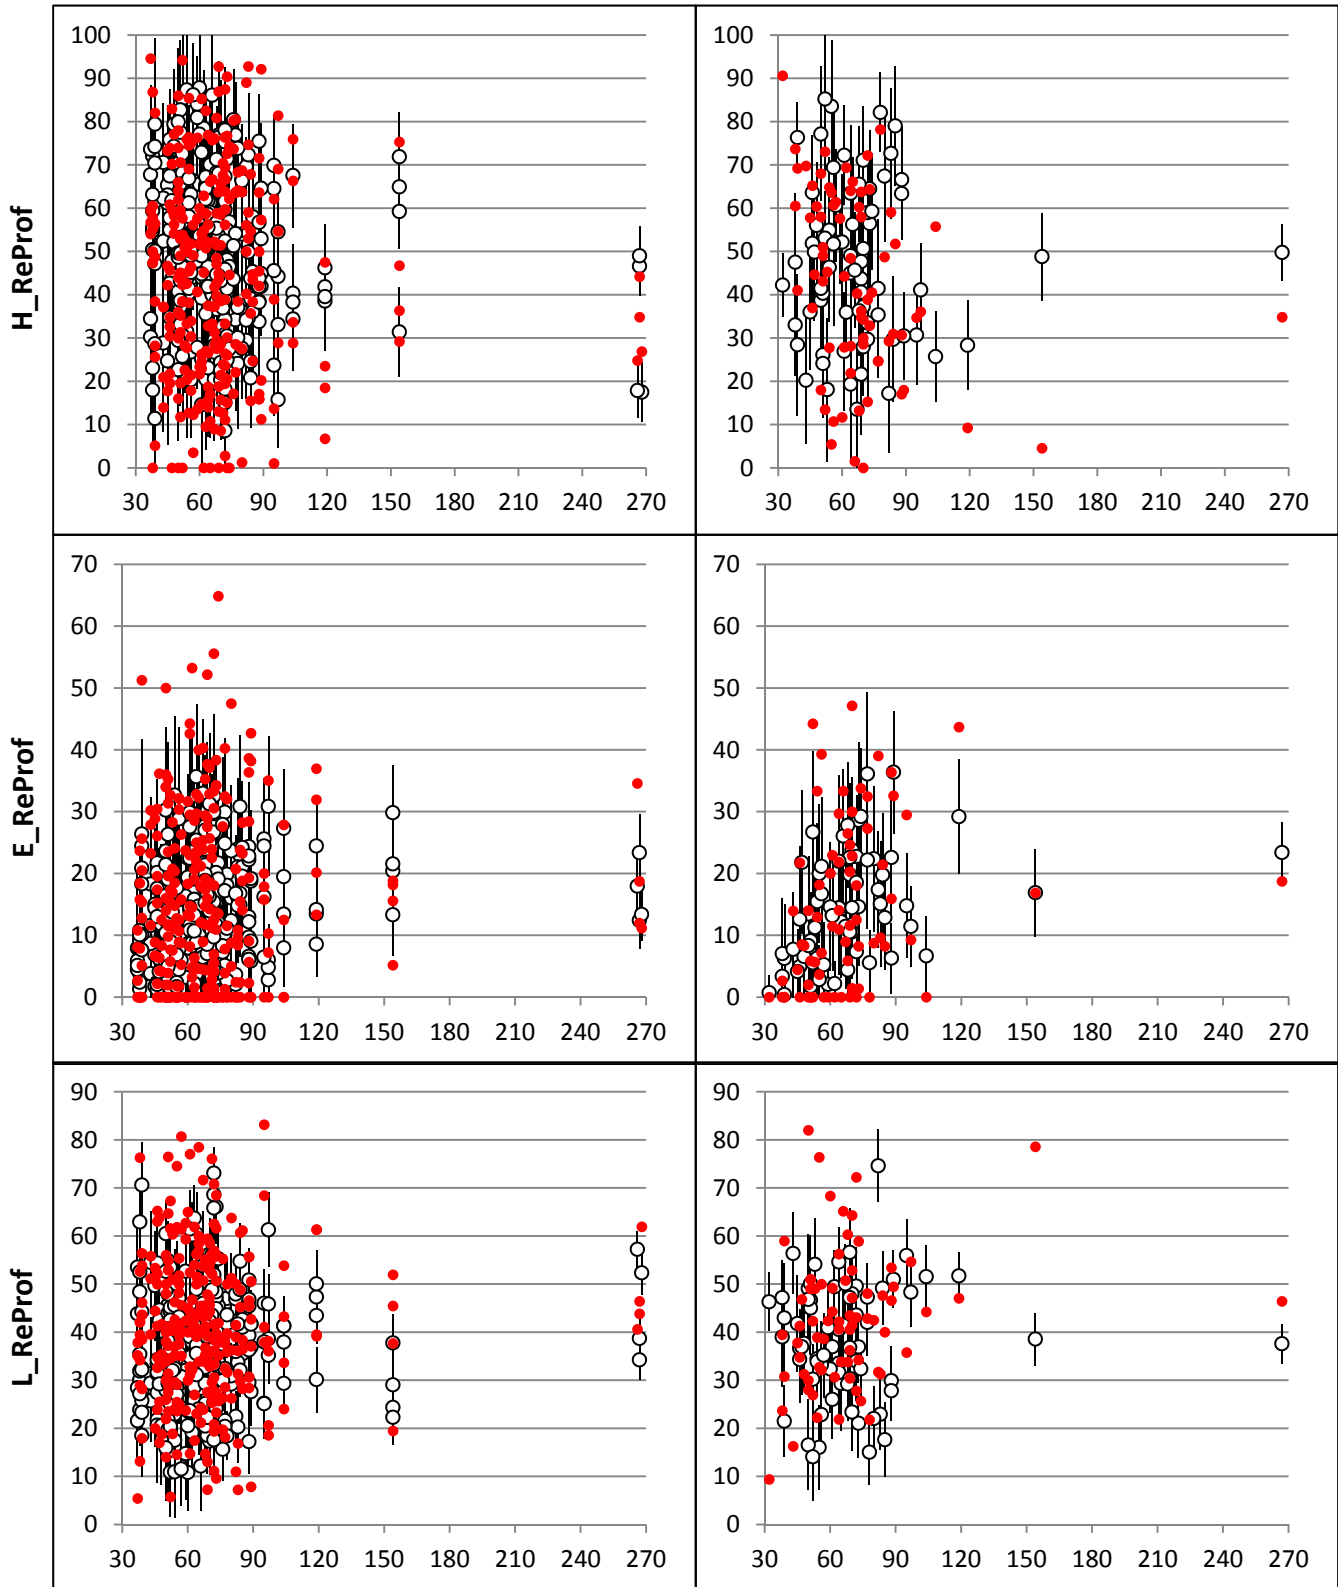

● – actual protein

○ – mean of 100 scrambled plus minus 1 StDev.

### annotated proteins

### novel proteins

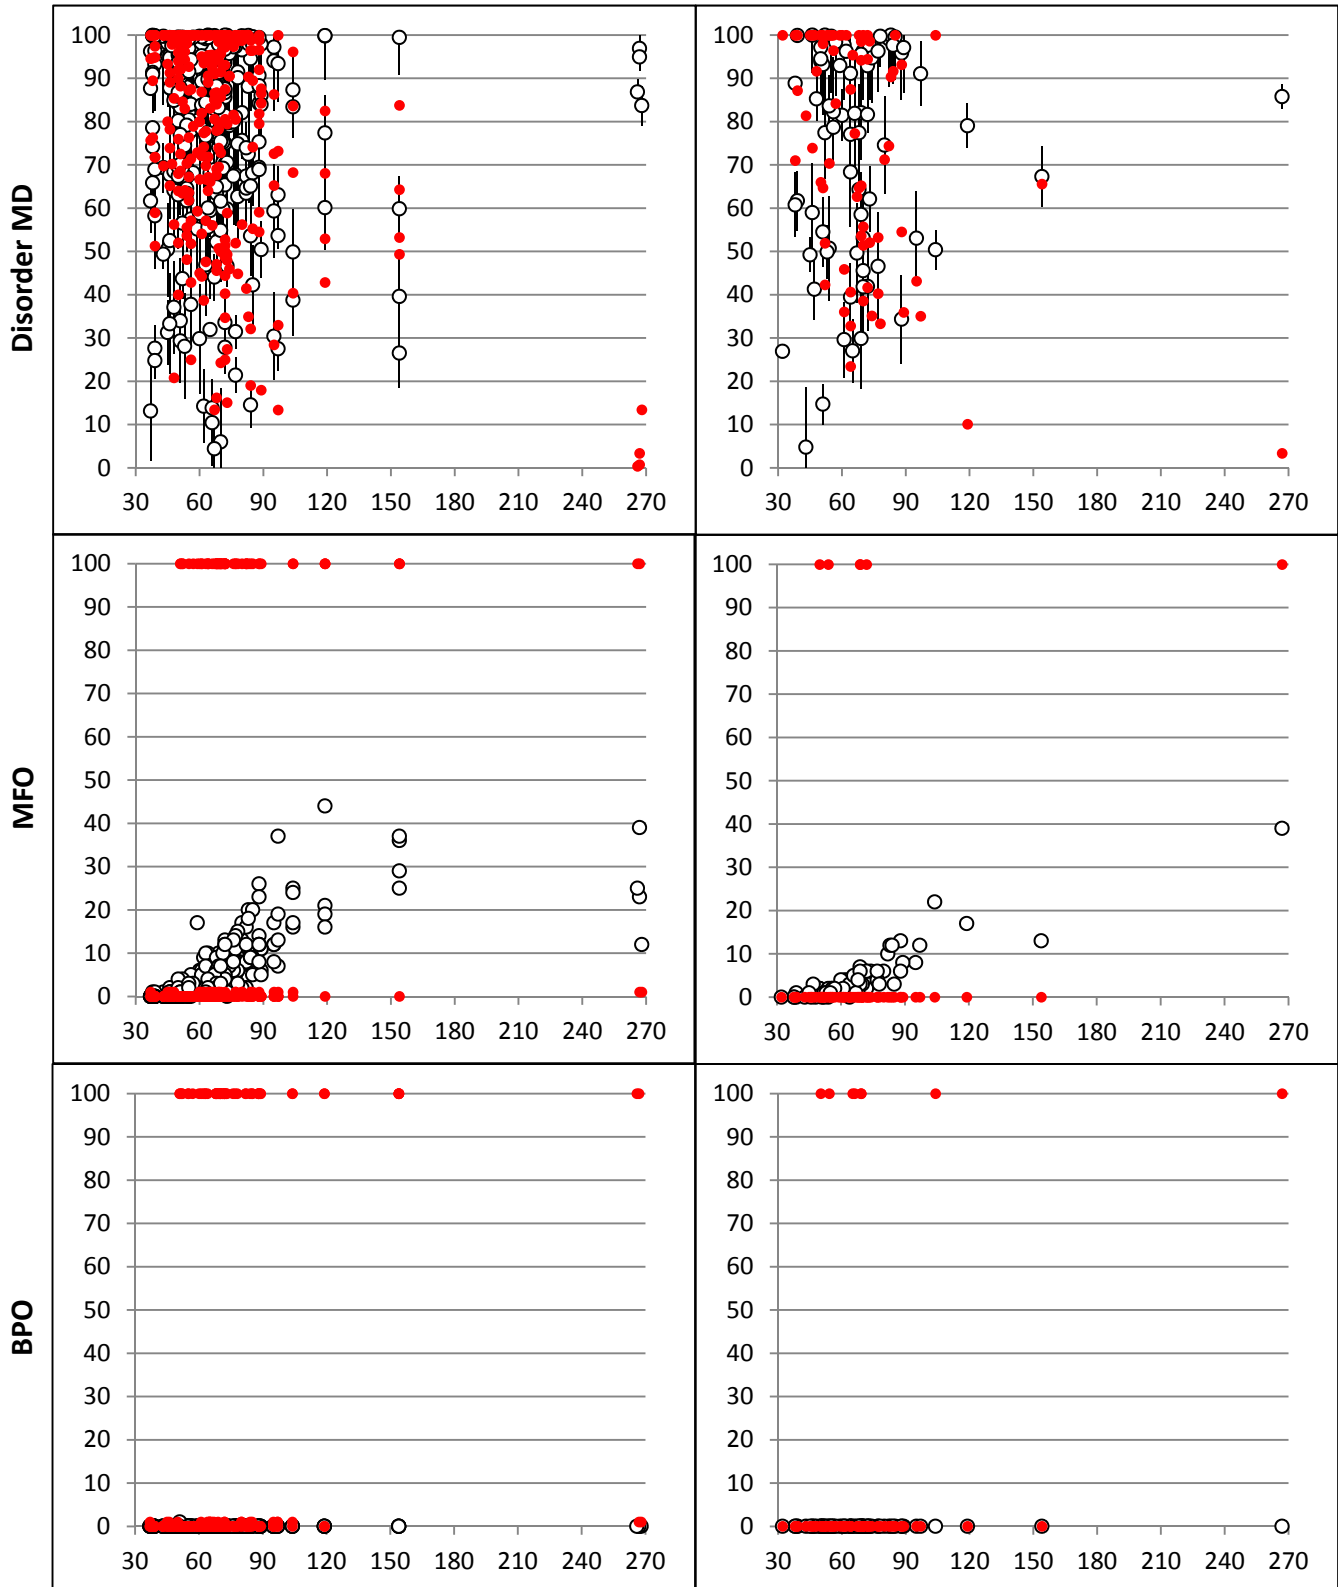

● – actual protein

○ – mean of 100 scrambled plus minus 1 StDev.

### cellular localization

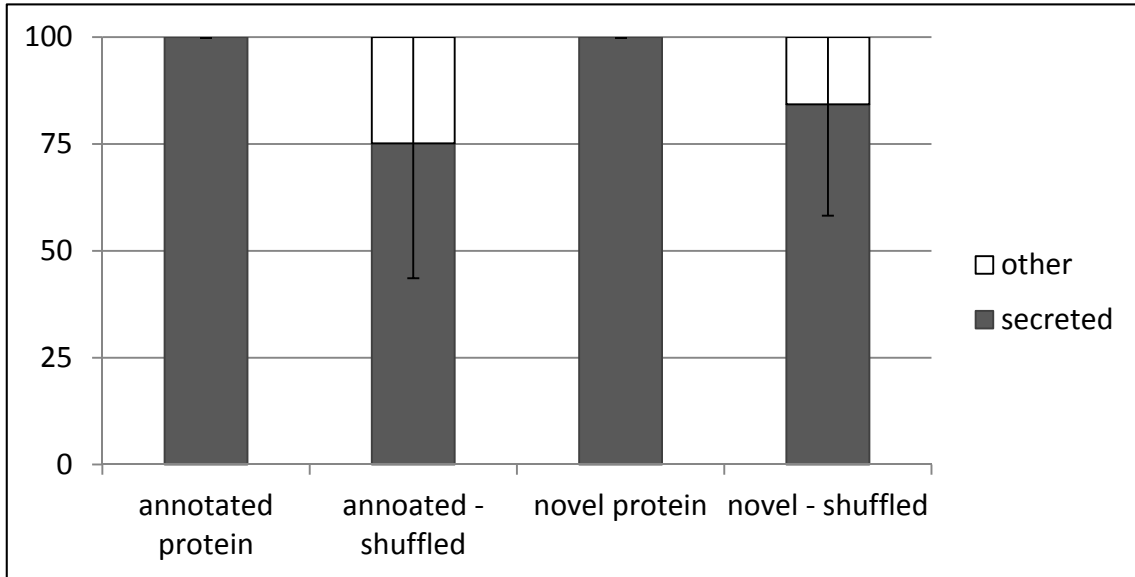

### amino acid composition

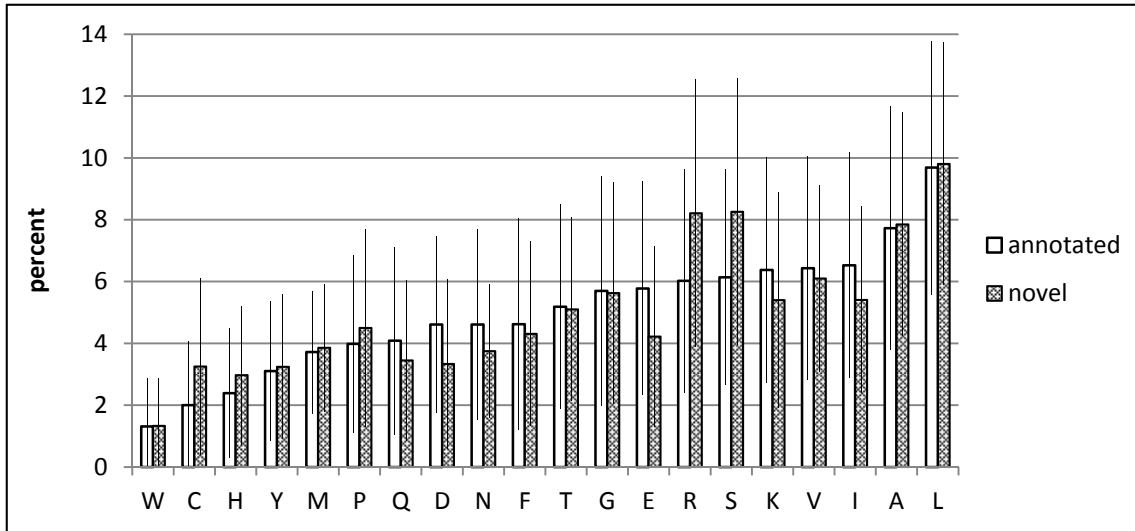

Supplement: 12864_2016_2456_MOESM5_ESM.pdf [file 12864_2016_2456_MOESM5_ESM.pdf]
