# Supplementary material for: Translatomics combined with transcriptomics and proteomics reveals novel functional, recently evolved orphan genes in Escherichia coli O157:H7 (EHEC)
Source: PubMed Central journal article supplement (PMC4765031; doi:10.1186/s12864-016-2456-1), 2016-02-24
Supplement: 12864_2016_2456_MOESM9_ESM.pdf [file 12864_2016_2456_MOESM9_ESM.pdf]

## Cumulative distribution of PSI-Blast family sizes

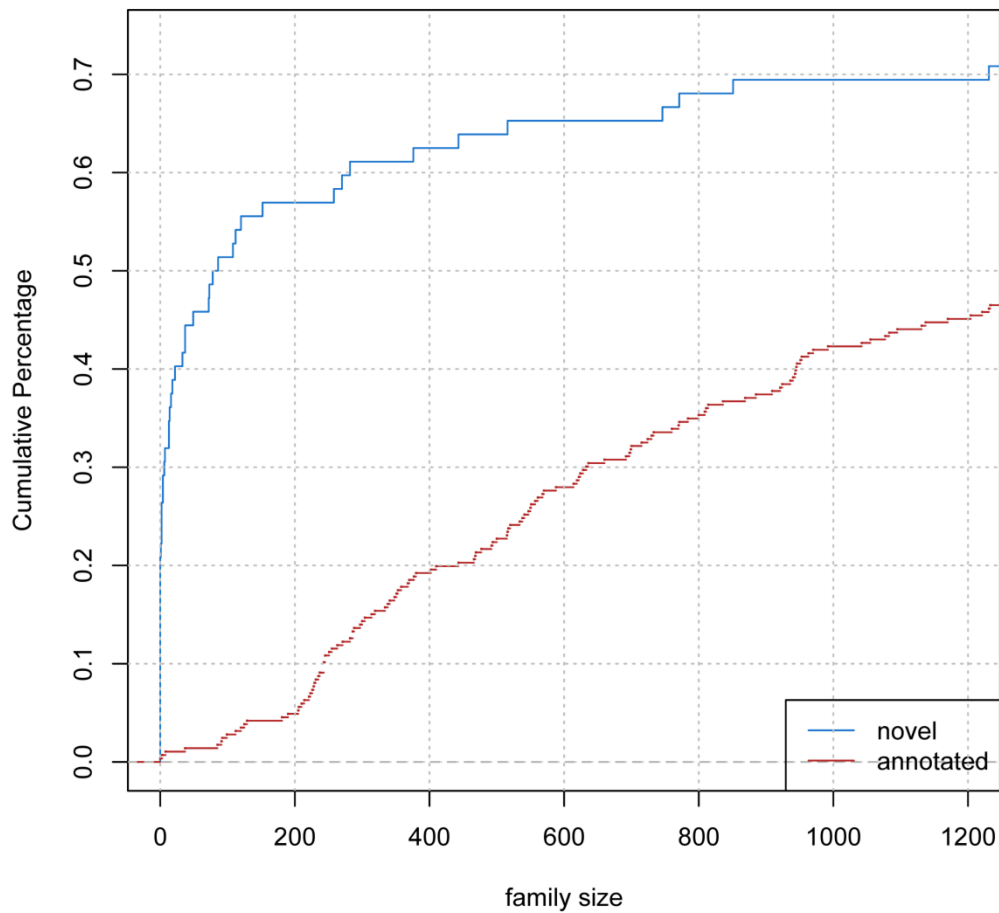

**PSI-Blast search at an E value of  $\leq 10^{-3}$ .** At this E-Value cut-off we count for each query how many subjects we receive in Uniprot, which is defined as „family size“. Shown is on the y-axis the cumulative percentage of the proteins (novel, blue; annotated, red) which have a family size of the same size or smaller than this given percentage of the proteins. E.g., at a family size of 200, about 57% of the novel proteins have a family size of 200 or less, but only about 5% of the annotated proteins have a family size of 200 or less. More important than the actual values is the trend, since the E-value or any chosen percentage / family size combination are of arbitrary choice. However, most of the novel proteins have small family sizes compared to the annotated.

## Cumulative distribution of HHblits family sizes

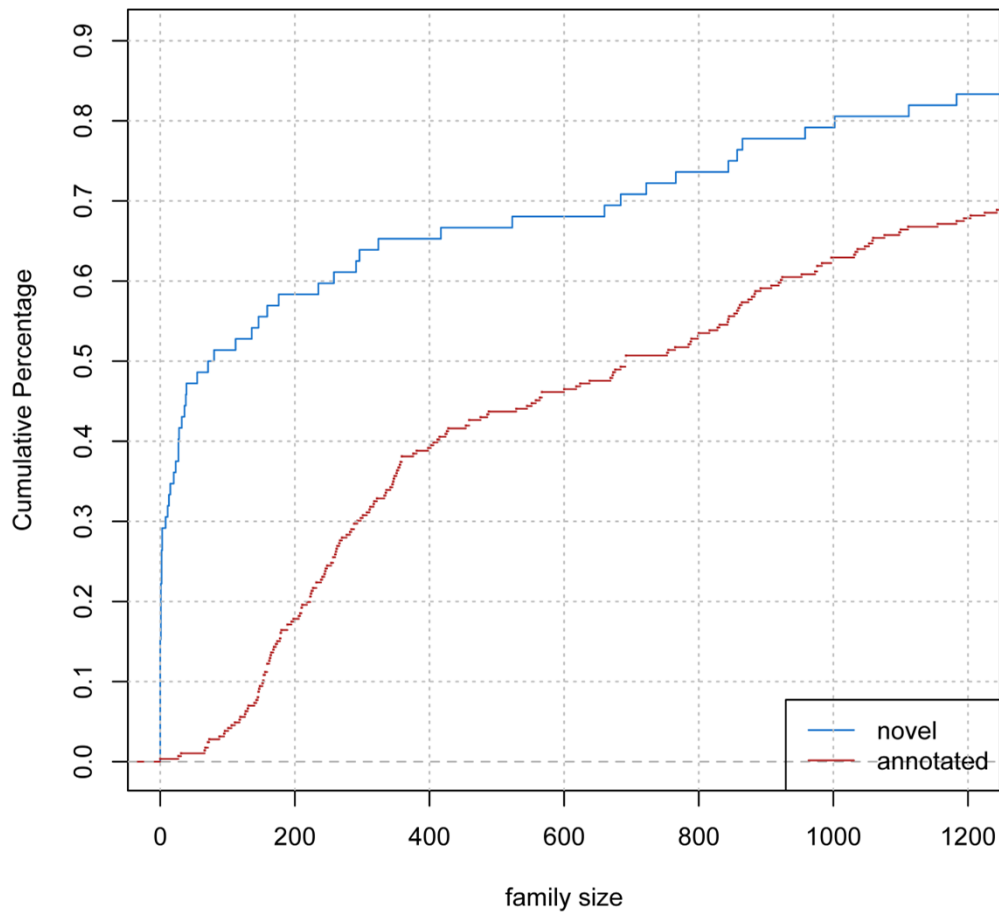

**HHblits search at an E value of  $\leq 10^{-3}$ .** At this E-Value cut-off we count for each query how many subjects we receive in Uniprot, which is defined as „family size“. Shown is on the y-axis the cumulative percentage of the proteins (novel, blue; annotated, red) which have a family size of the same size or smaller than this given percentage of the proteins. E.g., at a family size of 200, about 59% of the novel proteins have a family size of 200 or less, but only about 18% of the annotated proteins have a family size of 200 or less. More important than the actual values is the trend, since the E-value or any chosen percentage / family size combination are of arbitrary choice. However, most of the novel proteins have small family sizes compared to the annotated.
